# Supplementary material
Source: PubMed Central journal article supplement (PMC7116157)
Supplement: EMS96571-supplement-Supp_Info.pdf [file EMS96571-supplement-Supp_Info.pdf]

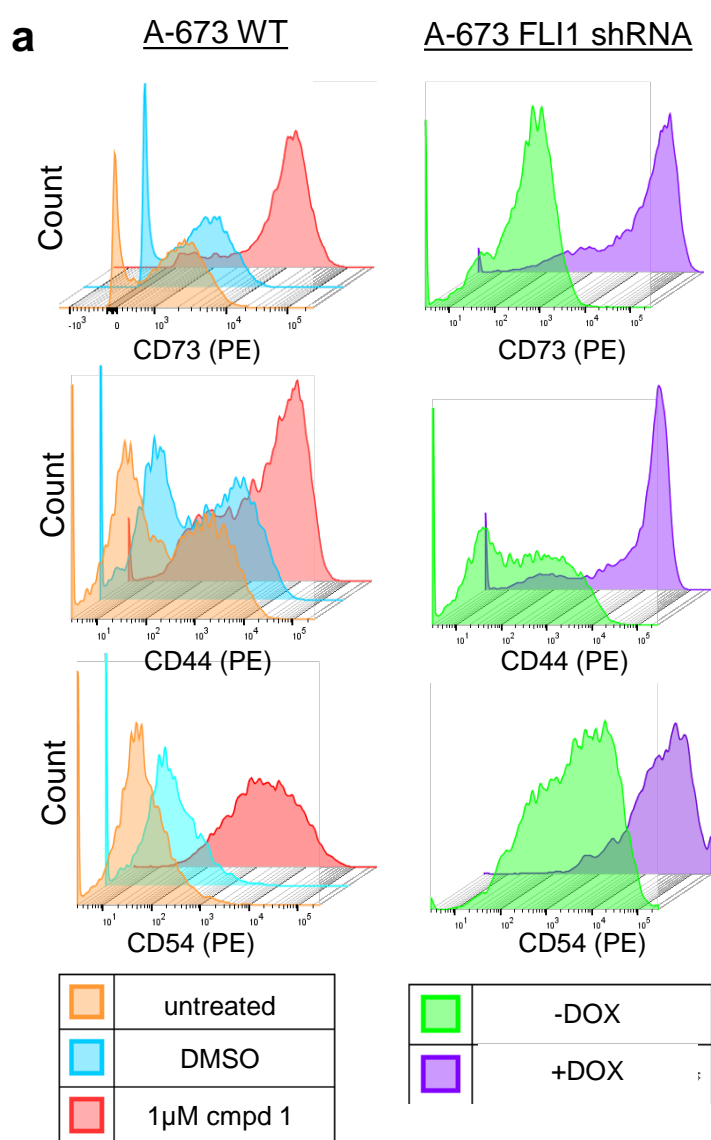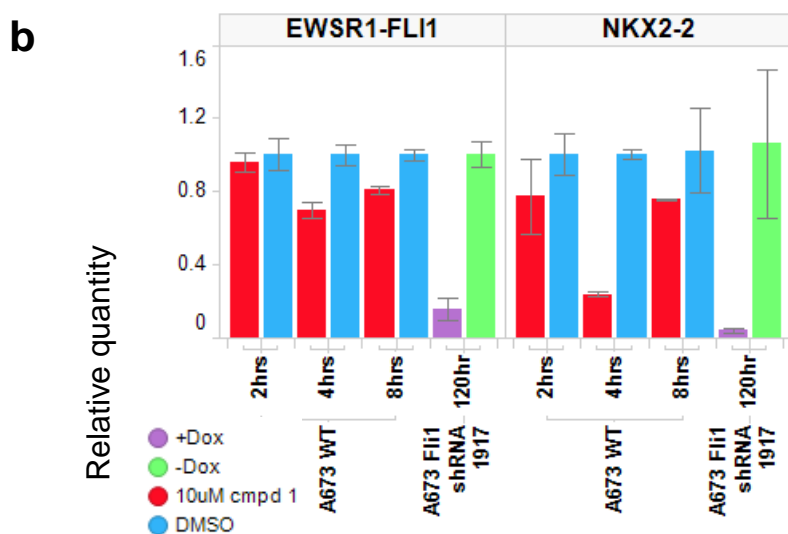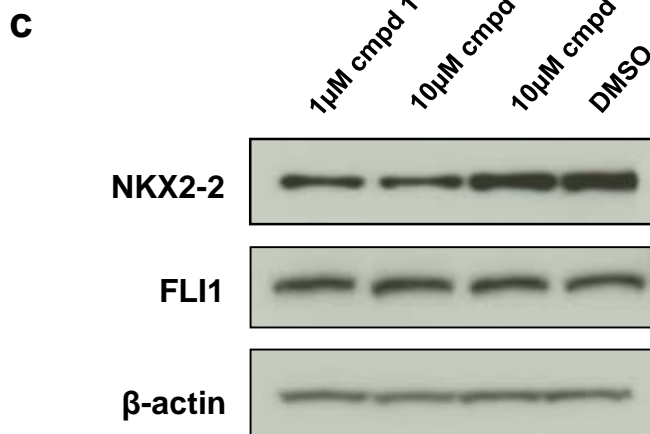

**Supplementary Figure 1: a**, FACS read-out for cell surface differentiation markers in A-673 cells, following compound **1** treatment (left panels) or upon knock-down of EWS-FLI1 in A-673 cells stably transduced with a vector containing published shRNA 1917 against FLI1 (right panels) (n=2). **b,c**, Analysis of EWS-FLI1 target gene NKX2-2 expression in response to treatment of A-673 cells with compound **1** by **(b)** RT-qPCR, with doxycycline (dox) inducible shRNA-mediated knock-down of EWS-FLI1 for comparison (relative quantification by standard curve was applied for all qPCR reactions, normalizing transcript quantities per target gene to those of endogenous control PPIA per sample and setting the DMSO-treated condition per target gene equal to 1. Center represents mean and error bars represent standard deviation, with three biological replicates per condition), or **(c)** by western blot with β-actin as loading control (repeated two independent times).

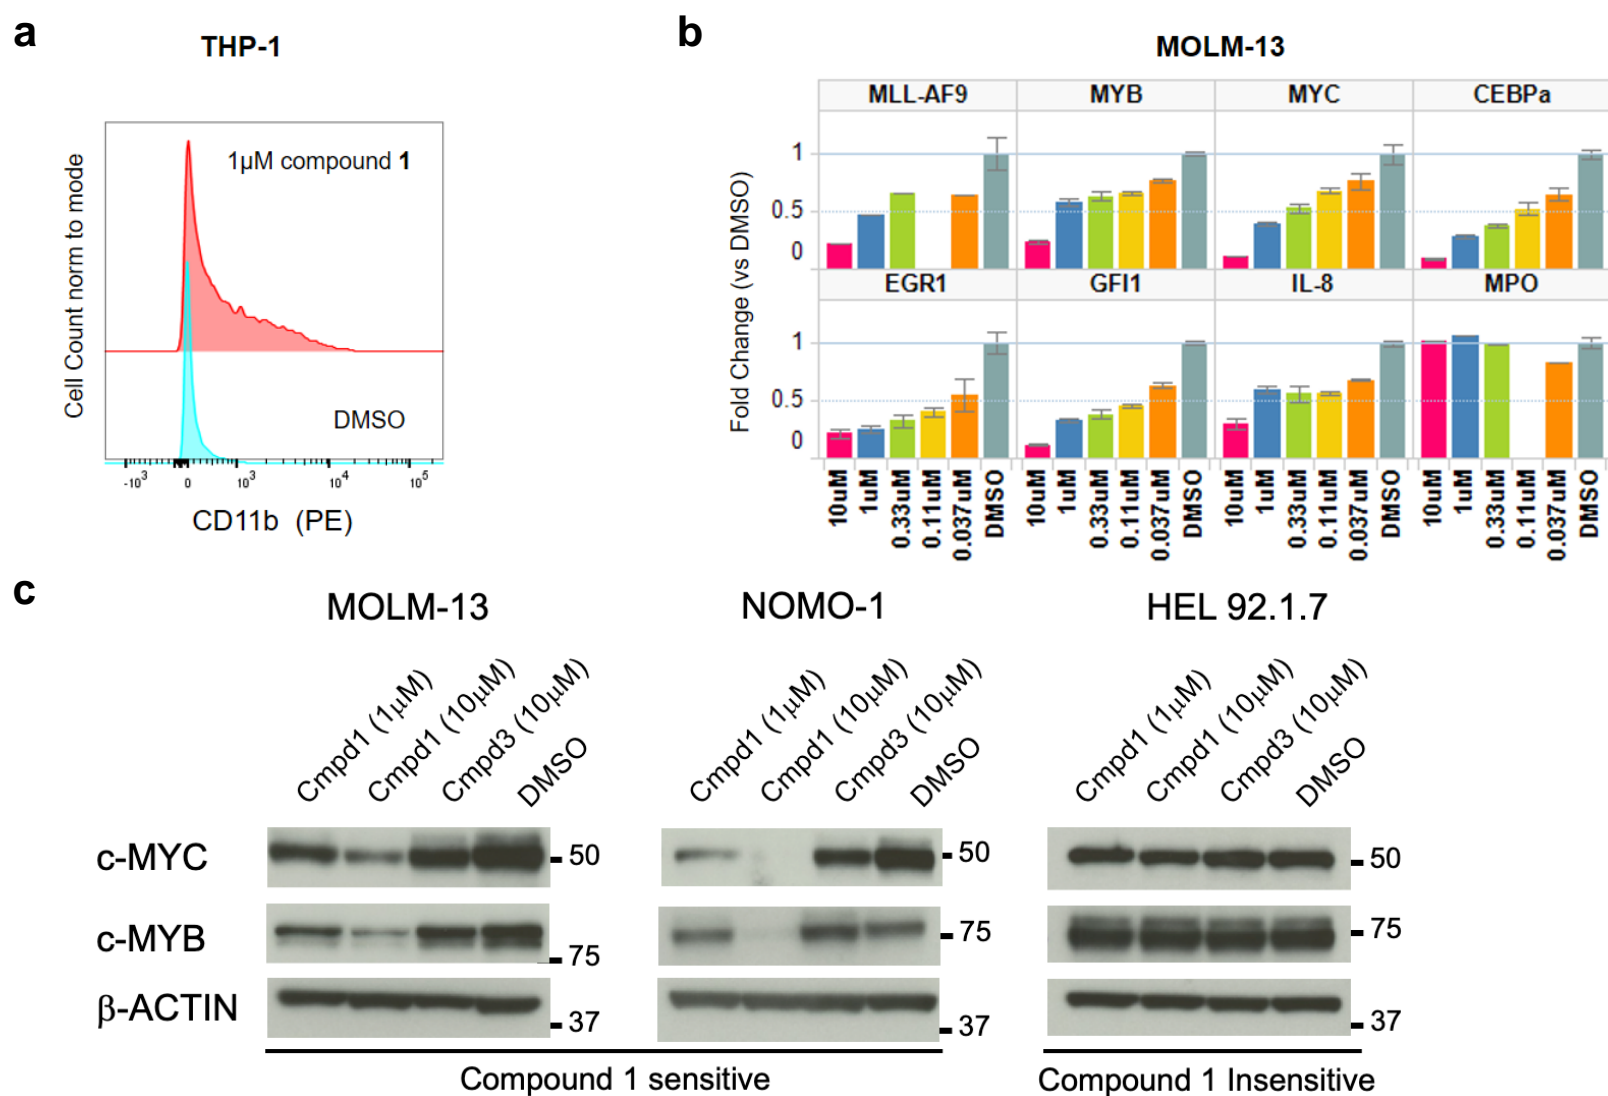

**Supplementary Figure 2:** **a**, FACS read-out for cell surface differentiation marker CD11b in THP-1 cells following compound 1 treatment for 72 h (n=1). **b**, Expression analysis by RT-qPCR of MLL-AF9 and a panel of known target genes in MOLM-13 cells treated with compound 1 in dose-response for 4 h (relative quantification by standard curve was applied for all qPCR reactions, normalizing transcript quantities per target gene to those of endogenous control PPIA per sample and setting the DMSO-treated condition per target gene equal to 1. Center value represents mean, error bars represent standard deviation, with three biological replicates, except for MLL-AF9 and MPO, which were processed as three technical replicates of one biological replicate). **c**, Expression analysis by western blot of c-MYC and c-MYB in response to compound 1 treatment comparing compound-sensitive AML cell lines with MLL-fusion (MOLM-13 and NOMO-1) to compound-insensitive and non-translocated AML cell line HEL 92.1.7 (repeated 3 independent times). An uncropped scan of this blot is provided in Supplementary Figure 20.

**a****Cell Cycle**

■ sub-G1 (%)  
 ■ G1 (%)  
 ■ S (%)  
 ■ G2 (%)

24 hours

4 hours

1.5 hours

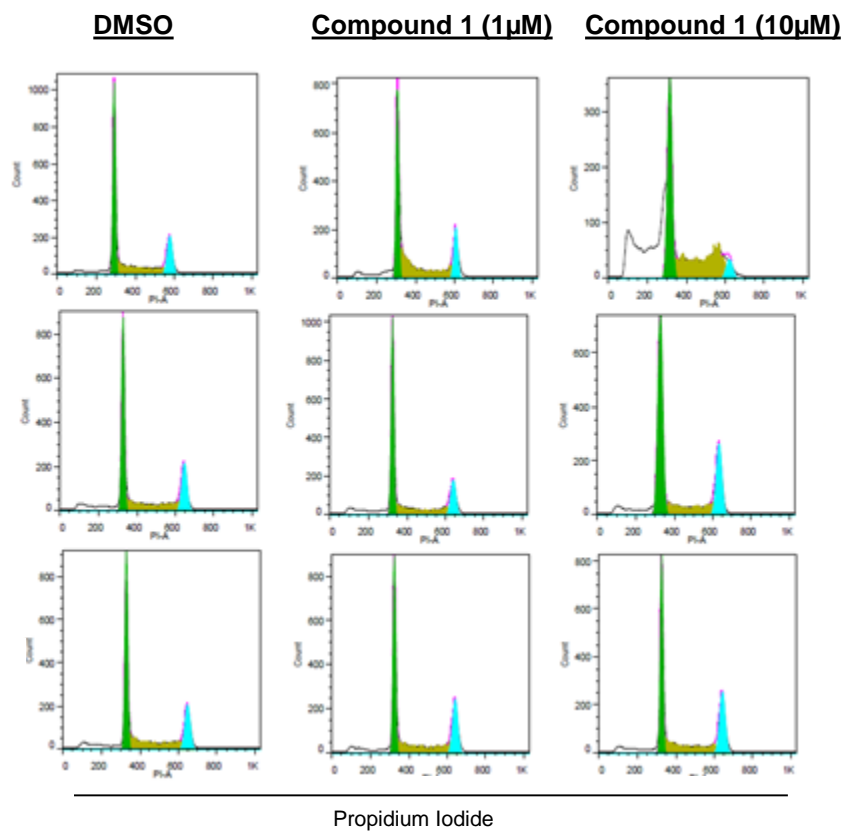**b****Apoptosis**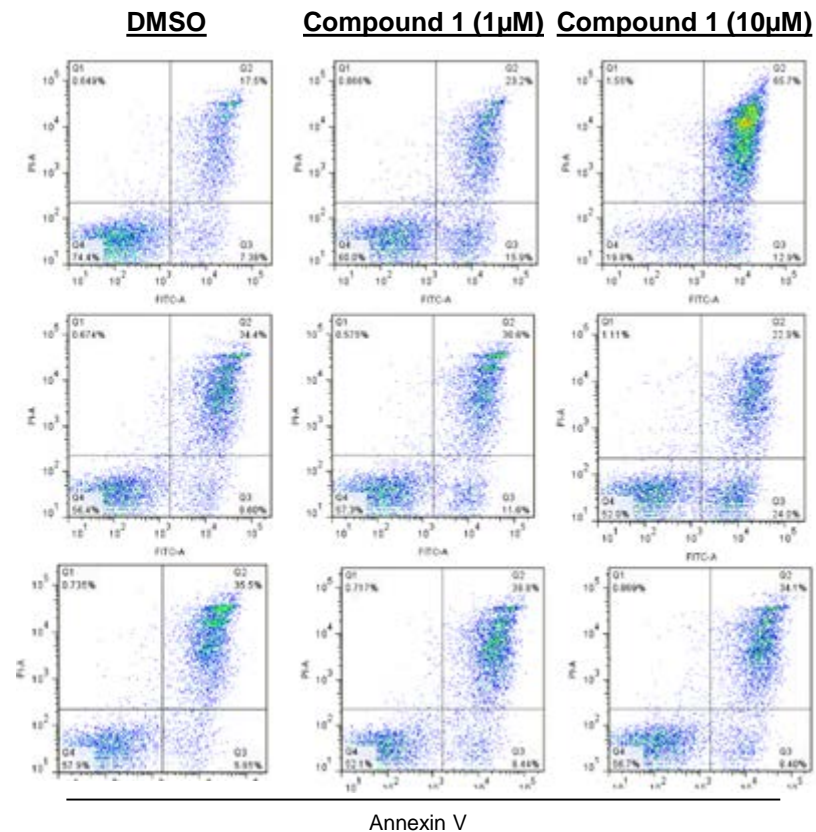

**Supplementary Figure 3: a**, Cell cycle analysis by propidium iodide staining or **b**, apoptosis assessment by Annexin V staining and FACS read-out in NOMO-1 cells treated with compound **1** as indicated (repeated independently two times).

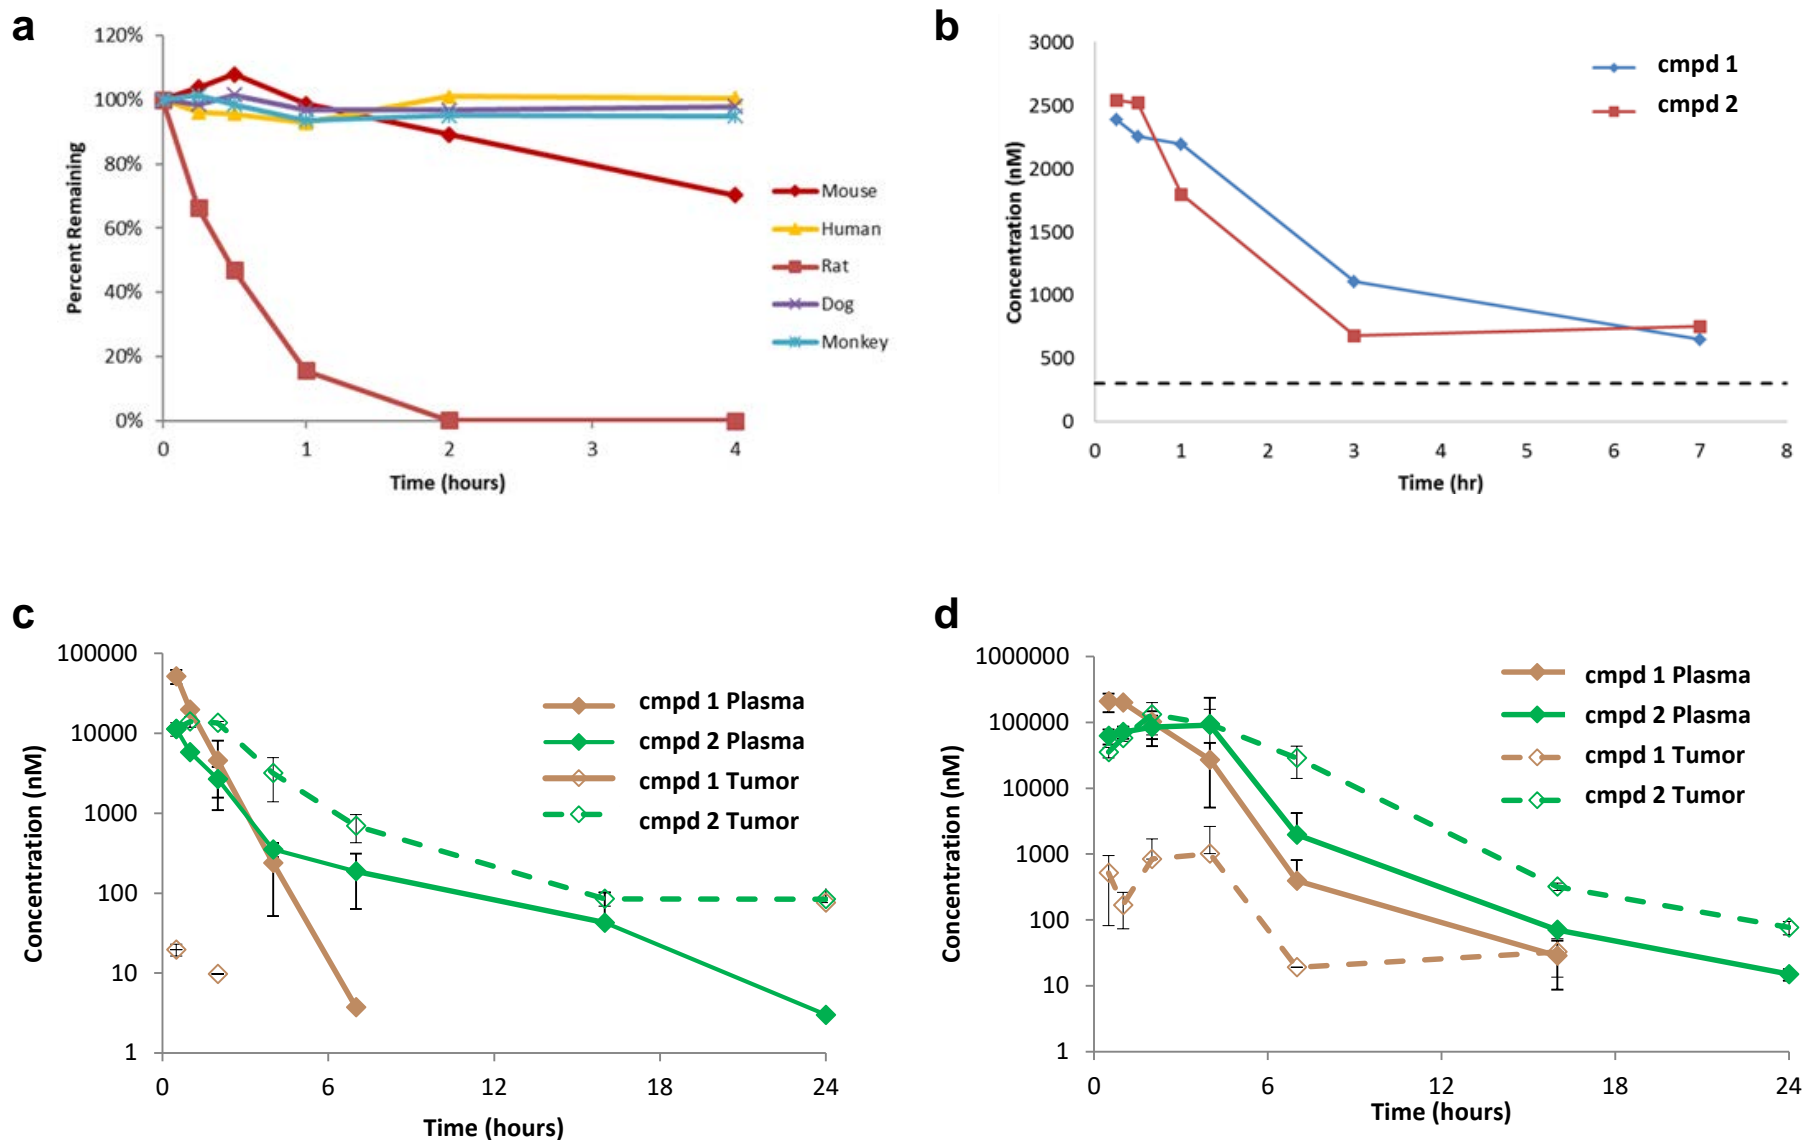

**Supplementary Figure 4:** MOLM-13 xenograft mouse *in vivo* study, including plasma stability and pharmacokinetics. **a**, Assessment of compound **1** stability in plasma per species as indicated, incubating 2.5 $\mu$ g/ml of **1** at 37°C for 4.5h in presence of K2 EDTA as anti-coagulant. **b**, Plasma concentration over time of compound **1** and **2** when dosing **1** subcutaneously in mice at 30mg/kg (n = 2). Black dashed line represents compound **1** IC<sub>50</sub> value in MOLM-13 cell line. **c,d**, Plasma and tumor concentration over time of compound **1** and **2** when dosing **1** subcutaneously at **(c)** 100 mg/kg or **(d)** at 400 mg/kg in mouse xenograft model (n = 3, presented as mean plus/minus standard deviation).

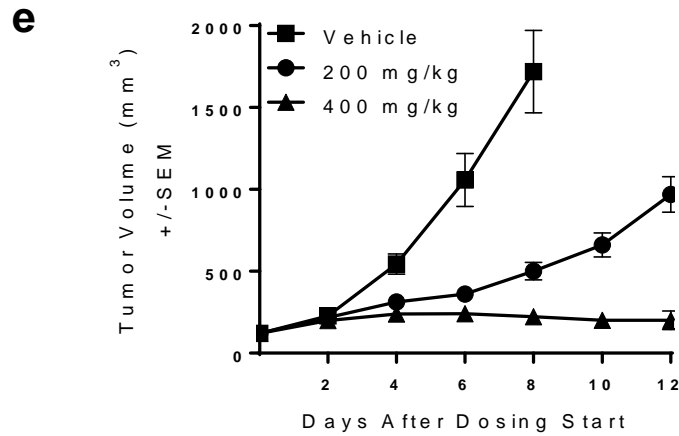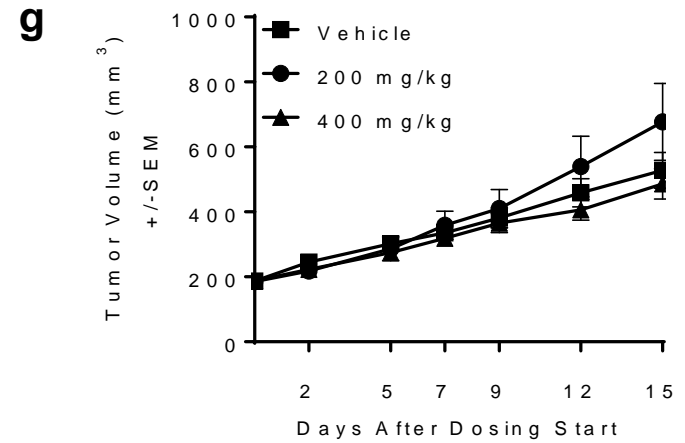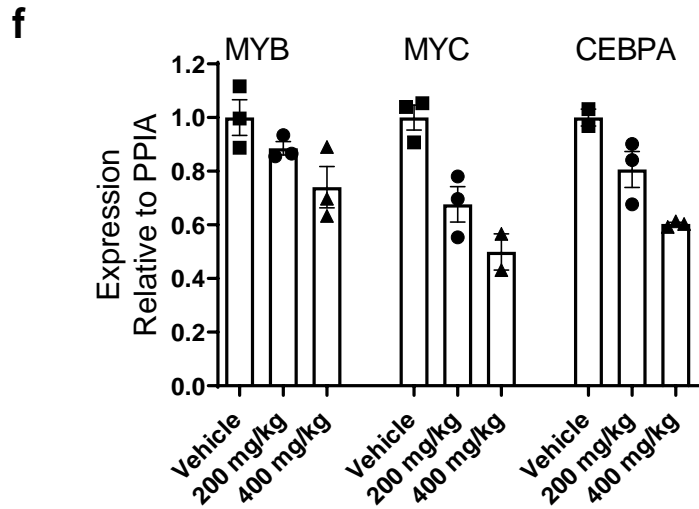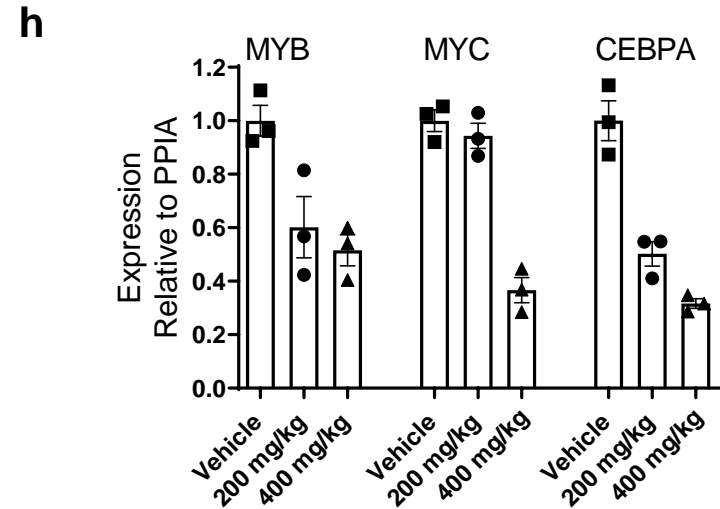

**Supplementary Figure 4 continued:** **e**, Tumor volume and **f**, biomarker expression by RT-qPCR in MOLM-13 mouse xenografts treated with compound **1**. **g**, Tumor volume and **h**, biomarker expression by RT-qPCR in mouse xenografts of A549 lung adenocarcinoma cells (compound insensitive, high CES1 expression) treated with compound **1**. For efficacy experiments,  $2 \times 10^6$  cells were implanted subcutaneously and allowed to grow until tumor volume reached 150-200 mm<sup>3</sup> (8 days for MOLM-13, 21 days for A549). **1** was dosed twice per day by subcutaneous injection. Relative quantification by comparative CT method was applied for all qPCR reactions, normalizing transcript quantities per target gene to those of endogenous control PPIA per sample and setting the vehicle-treated condition per target gene equal to 1. Center value presented as mean plus/minus standard error of mean, with eight animals per treatment group.

**a**

| GO term                                                                              | FDR      | Genes in network | Genes in genome | GO term type       | GO accession |
|--------------------------------------------------------------------------------------|----------|------------------|-----------------|--------------------|--------------|
| termination of RNA polymerase II transcription                                       | 4.21E-47 | 25               | 45              | biological_process | GO:0006369   |
| mRNA 3'-end processing                                                               | 2.06E-40 | 26               | 88              | biological_process | GO:0031124   |
| DNA-templated transcription, termination                                             | 6.25E-39 | 25               | 84              | biological_process | GO:0006353   |
| RNA 3'-end processing                                                                | 6.47E-39 | 26               | 101             | biological_process | GO:0031123   |
| RNA splicing, via transesterification reactions with bulged adenosine as nucleophile | 1.97E-28 | 25               | 208             | biological_process | GO:0000377   |
| mRNA splicing, via spliceosome                                                       | 1.97E-28 | 25               | 208             | biological_process | GO:0000398   |
| RNA splicing, via transesterification reactions                                      | 3.47E-28 | 25               | 214             | biological_process | GO:0000375   |
| mRNA processing                                                                      | 3.47E-28 | 27               | 288             | biological_process | GO:0006397   |
| RNA splicing                                                                         | 1.61E-25 | 25               | 274             | biological_process | GO:0008380   |
| nucleic acid transport                                                               | 1.08E-18 | 15               | 85              | biological_process | GO:0050657   |
| RNA transport                                                                        | 1.08E-18 | 15               | 85              | biological_process | GO:0050658   |
| RNA localization                                                                     | 1.08E-18 | 15               | 84              | biological_process | GO:0006403   |
| establishment of RNA localization                                                    | 1.08E-18 | 15               | 85              | biological_process | GO:0051236   |
| mRNA export from nucleus                                                             | 2.46E-18 | 14               | 68              | biological_process | GO:0006406   |
| mRNA transport                                                                       | 2.87E-18 | 14               | 69              | biological_process | GO:0051028   |
| RNA export from nucleus                                                              | 1.18E-17 | 14               | 76              | biological_process | GO:0006405   |
| nucleobase-containing compound transport                                             | 2.81E-17 | 15               | 106             | biological_process | GO:0015931   |
| nuclear export                                                                       | 3.77E-15 | 14               | 113             | biological_process | GO:0051168   |
| mRNA cleavage factor complex                                                         | 4.78E-12 | 7                | 12              | cellular_component | GO:0005849   |
| RNA polyadenylation                                                                  | 1.33E-11 | 8                | 24              | biological_process | GO:0043631   |

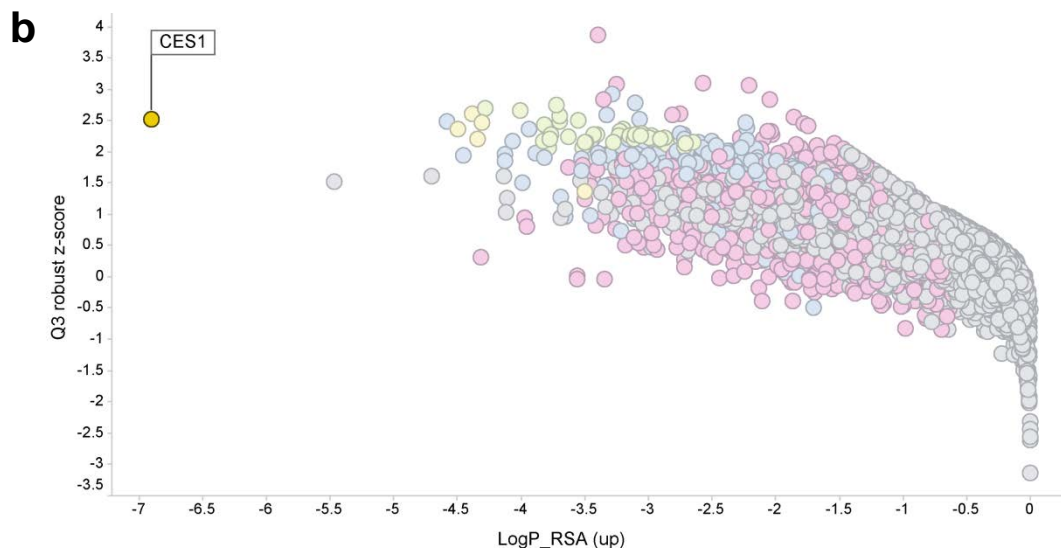

**Supplementary Figure 5:** Genome-wide siRNA plus compound synergy screen. The siRNA library was tested as one replicate with each gene represented by  $n=8$  siRNAs on average per condition. **a**, 20 most highly enriched GO terms from GeneMANIA analysis of top 50 gene candidates (compound **1** minus DMSO analysis). **b**, Full genome siRNA plus compound **1** synergy screen in A-673 cells, with cell viability read-out via CellTiter Glo assay, as shown in Figure 2a, but here plotting of redundant siRNA activity (RSA statistical model, one-sided, up) versus Q3 Z-score to identify siRNA-targeted genes whose knock-down desensitized cells to compound **1** treatment. Top screening hit CES1 labeled.

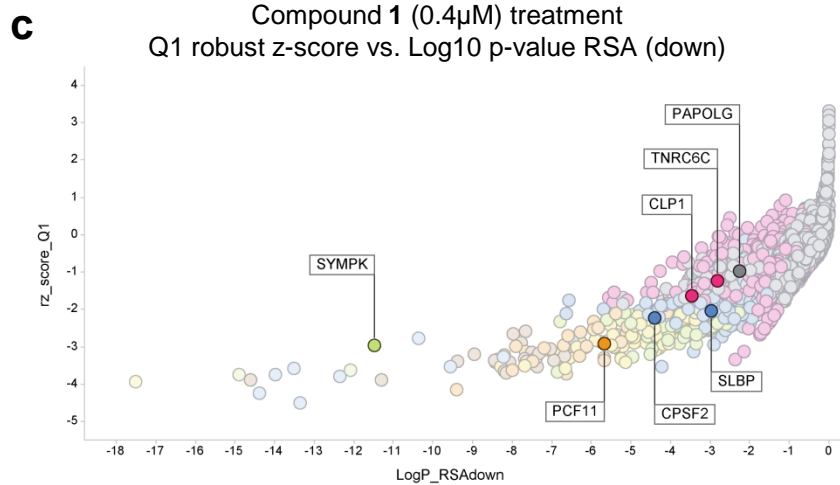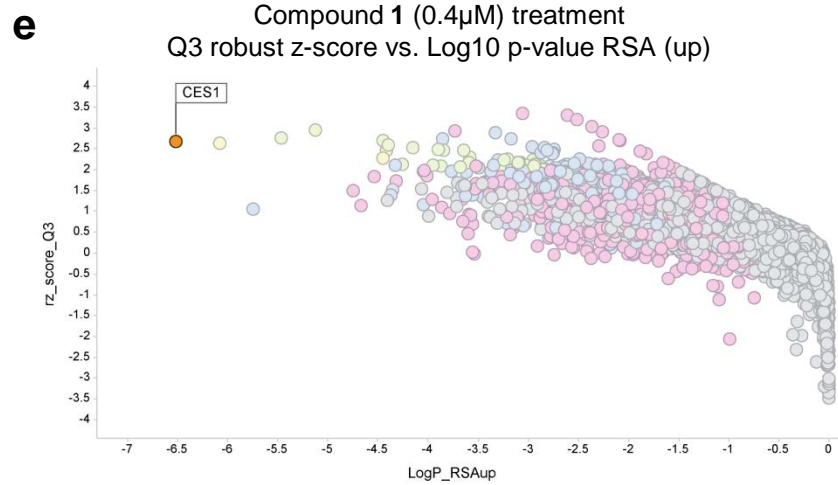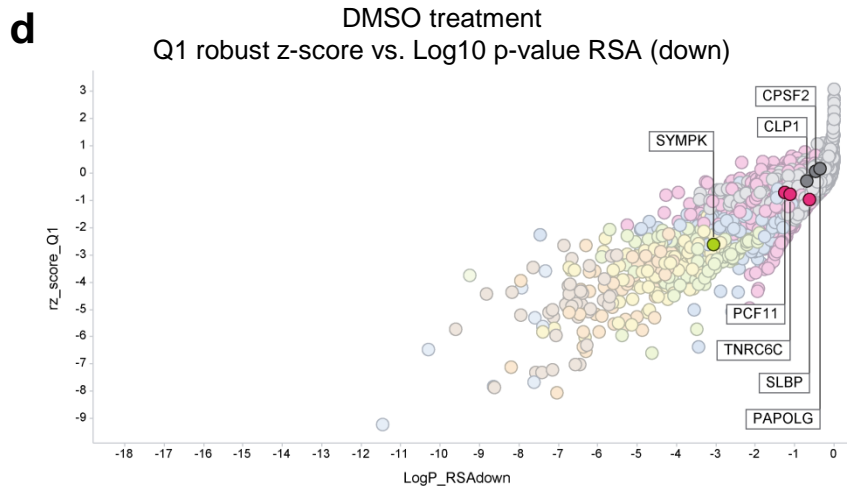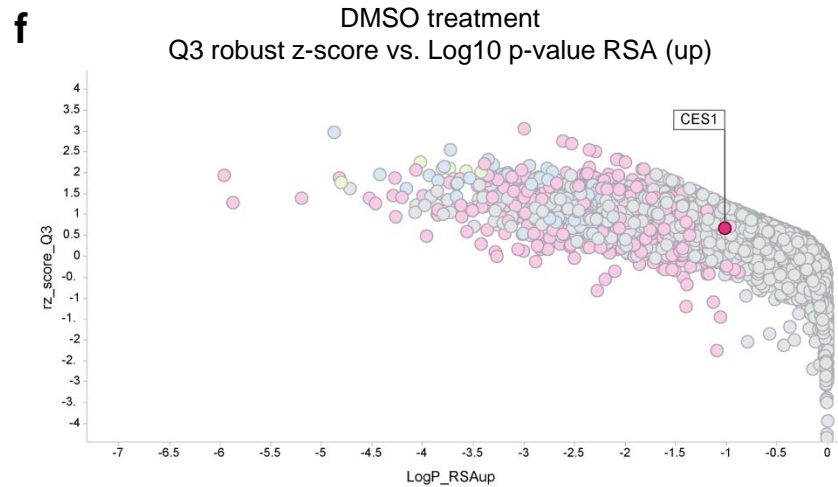

**Supplementary Figure 5 continued:** c-f, Gene-level activity in individual screening conditions as indicated. Known regulators of mRNA processing (RSA statistical model, one-sided, down versus Q1) as well as CES1 (RSA statistical model, one-sided, up versus Q3) are highlighted and named.

**a**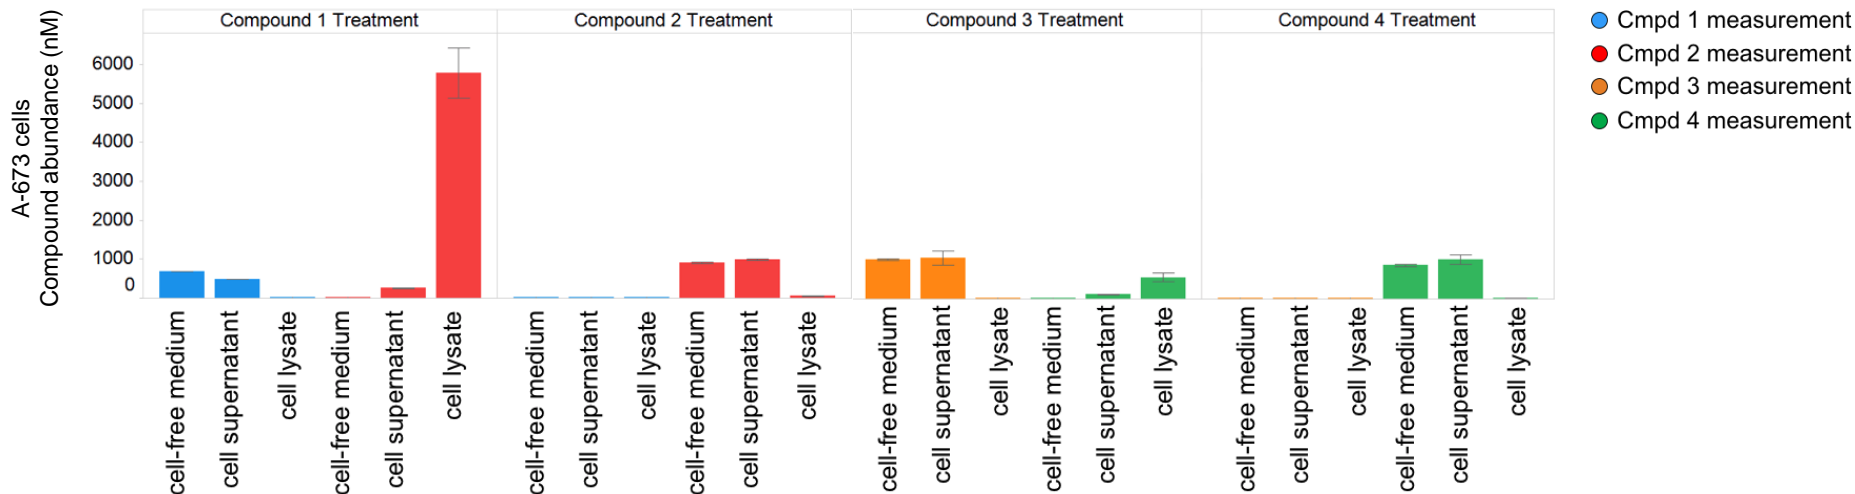**b**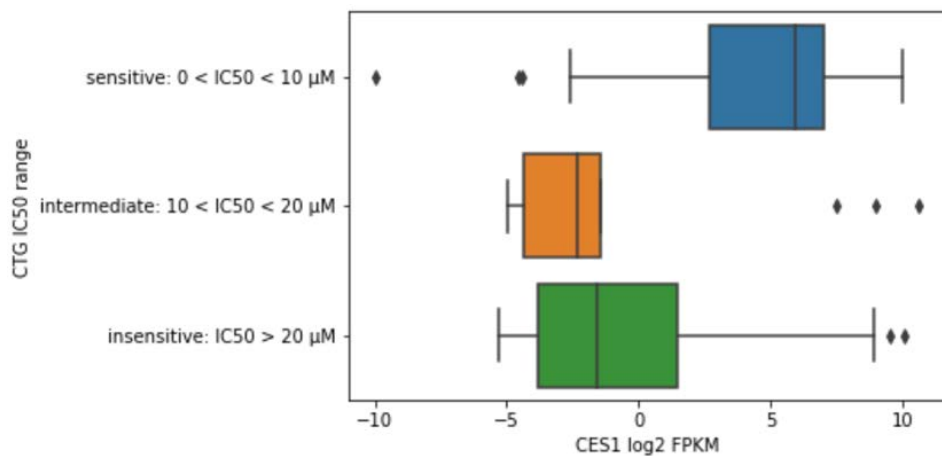

| cell_viability_ctg_assay_ic50_range          | count | mean         | std         | min          | 25%          | 50%          | 75%          | max         |
|----------------------------------------------|-------|--------------|-------------|--------------|--------------|--------------|--------------|-------------|
| insensitive: IC <sub>50</sub> > 20 -μM       | 33    | -0.256780663 | 4.705832014 | -5.288398479 | -3.841009155 | -1.602478555 | 1.489078884  | 10.05994969 |
| intermediate: 10 < IC <sub>50</sub> < 20 -μM | 13    | -0.383578782 | 5.548321975 | -4.971039387 | -4.33566764  | -2.342195007 | -1.422455742 | 10.63364717 |
| sensitive: 0 < IC <sub>50</sub> < 10 -μM     | 29    | 4.362697636  | 4.829708908 | -9.965784285 | 2.688829832  | 5.965276354  | 6.988612272  | 10.01360107 |

Supplementary Figure 6:



**c**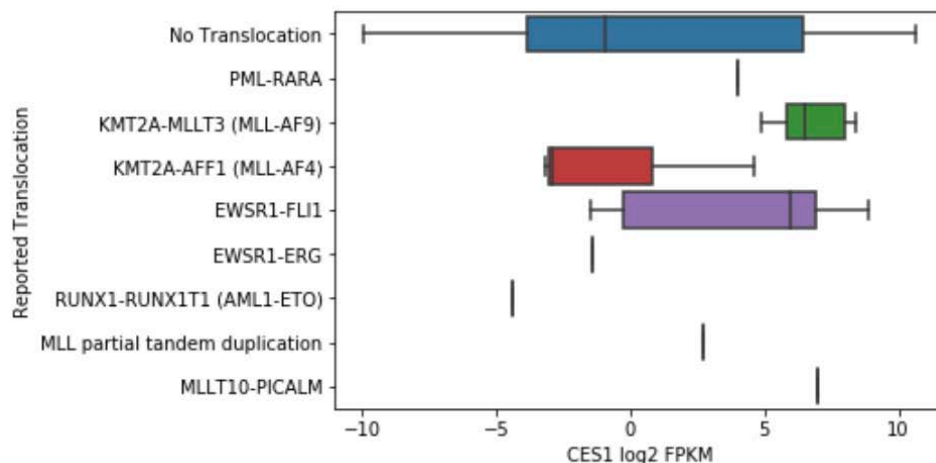

| transloc                       | count | mean         | std         | min          | 25%          | 50%          | 75%          | max          |
|--------------------------------|-------|--------------|-------------|--------------|--------------|--------------|--------------|--------------|
| EWSR1-ERG                      | 1     | -1.422455742 |             | -1.422455742 | -1.422455742 | -1.422455742 | -1.422455742 | -1.422455742 |
| EWSR1-FLI1                     | 5     | 3.99409302   | 4.578493264 | -1.485170226 | -0.248255271 | 5.965276354  | 6.891957358  | 8.846656884  |
| KMT2A-AFF1 (MLL-AF4)           | 3     | -0.511452519 | 4.410127831 | -3.193600633 | -3.056408698 | -2.919216763 | 0.829621539  | 4.57845984   |
| KMT2A-MLLT3 (MLL-AF9)          | 5     | 6.722386443  | 1.492343251 | 4.85184068   | 5.83895357   | 6.482208176  | 8.008769571  | 8.430160218  |
| MLL partial tandem duplication | 1     | 2.688829832  |             | 2.688829832  | 2.688829832  | 2.688829832  | 2.688829832  | 2.688829832  |
| MLLT10-PICALM                  | 1     | 6.988612272  |             | 6.988612272  | 6.988612272  | 6.988612272  | 6.988612272  | 6.988612272  |
| No Translocation               | 57    | 0.933014101  | 5.519291564 | -9.965784285 | -3.841009155 | -0.915516826 | 6.422854329  | 10.63364717  |
| PML-RARA                       | 1     | 3.991000923  |             | 3.991000923  | 3.991000923  | 3.991000923  | 3.991000923  | 3.991000923  |
| RUNX1-RUNX1T1 (AML1-ETO)       | 1     | -4.417885379 |             | -4.417885379 | -4.417885379 | -4.417885379 | -4.417885379 | -4.417885379 |

**Supplementary Figure 6: a**, A-673 compound sensitive cells treated with compound **1**, **2**, **3**, or **4** for 4h. The presence or appearance of each compound were measured by mass spectrometry in media without cells (cell-free media), media from wells containing cells (cell supernatant), or from lysates of washed cell pellets (cell lysate). Center value represents mean and error bars represent standard deviation (n=3). **b,c**, Comparison of CES1 mRNA expression to (**b**) sensitivity to compound **1** across 92 cell line panel or to (**c**) reported translocation status among AML and Ewing's sarcoma cell lines tested. Boxplots in (**b,c**) represent Median bounded by Q1 and A3, with bars extended to cover the standard deviation.

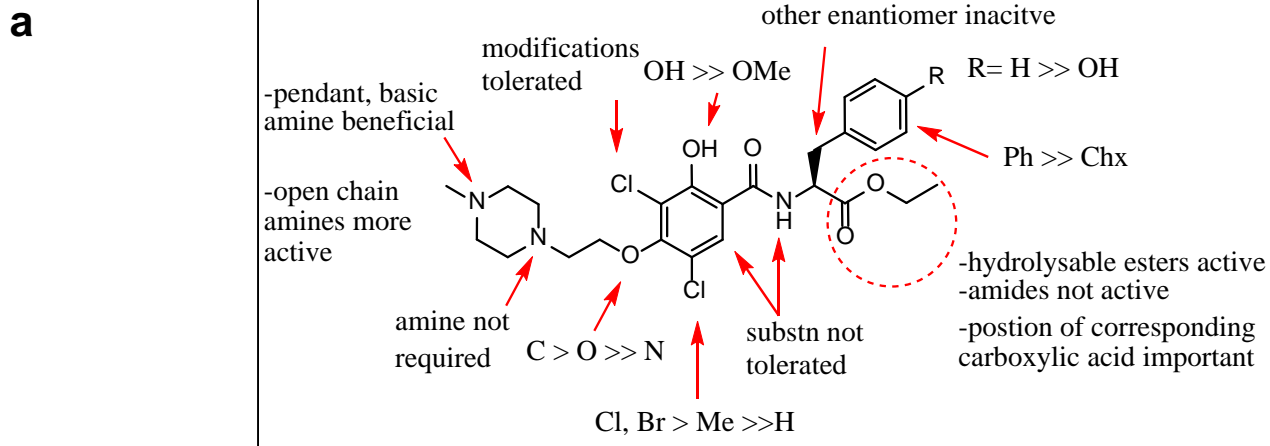

**b**

|                                            | <b>1</b>                                      | <b>2</b>                                      | <b>3</b>                                    | <b>5</b>                                      |
|--------------------------------------------|-----------------------------------------------|-----------------------------------------------|---------------------------------------------|-----------------------------------------------|
| AML cell lines sensitive to compound 1     | MOLM-13: 0.27 $\mu$ M<br>NOMO-1: 0.48 $\mu$ M | MOLM-13: 0.43 $\mu$ M*<br>NOMO-1: >30 $\mu$ M | MOLM-13: >30 $\mu$ M<br>NOMO-1: >30 $\mu$ M | MOLM-13: 0.18 $\mu$ M<br>NOMO-1: 0.32 $\mu$ M |
| AML cell lines not sensitive to compound 1 | CMK: >30 $\mu$ M<br>HEL92.1.7: >30 $\mu$ M    | CMK: >30 $\mu$ M<br>HEL92.1.7: >30 $\mu$ M    | CMK: >30 $\mu$ M<br>HEL92.1.7: >30 $\mu$ M  | CMK: >30 $\mu$ M<br>HEL92.1.7: >30 $\mu$ M    |
| Ewing's sarcoma sensitive to compound 1    | A-673: 0.55 $\mu$ M<br>SK-ES-1: 0.60 $\mu$ M  | A-673: >30 $\mu$ M<br>SK-ES-1: >30 $\mu$ M    | A-673: >30 $\mu$ M<br>SK-ES-1: >30 $\mu$ M  | A-673: 2.3 $\mu$ M<br>SK-ES-1: 2.5 $\mu$ M    |

\* partial activity

**Supplementary Figure 7: a**, Structure-activity relationships for compound 1. **b**, IC<sub>50</sub> values for compounds as indicated, derived from cell viability (CellTiter Glo) experiments across six cell lines used for compound optimization and SAR.

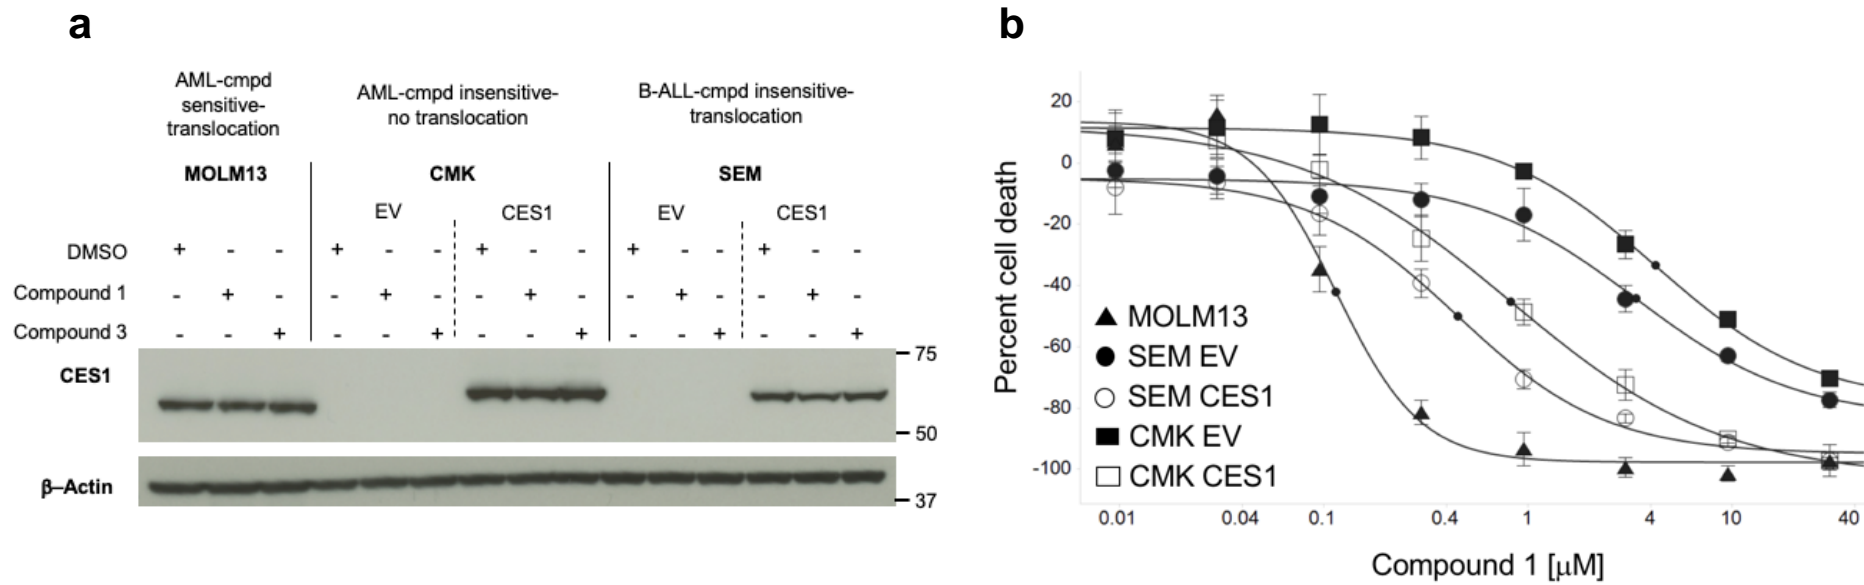

**Supplementary Figure 8: a**, Western blot assay to assess CES1 protein expression following stable viral transduction of human CES1 cDNA into CMK or SEM cell lines, with empty vector (EV) transduction as control. Treatment with 10μM compound 1 or 3 or DMSO as indicated. Non-transfected MOLM13 cell line shown for comparison (n=2). An uncropped scan of this blot is provided in Supplementary Figure 21a. **b**, Cell viability assessment of CES1 versus EV transduced CMK and SEM cell lines as indicated in response to compound 1 treatment in 8-point dose-response, with non-transfected MOLM13 cell line assayed in parallel (n=6, center point represents mean, error bars represent standard deviation, small black dots on fitted curves represent IC<sub>50</sub> values).

Input material: 5 mg Nomo-1 (9:1 S0.8+P0.8; no benzonase treatment)  
Affinity matrix: Compound **6**  
Competition compound: 0 (-) or 100  $\mu$ M (+) compound **2**

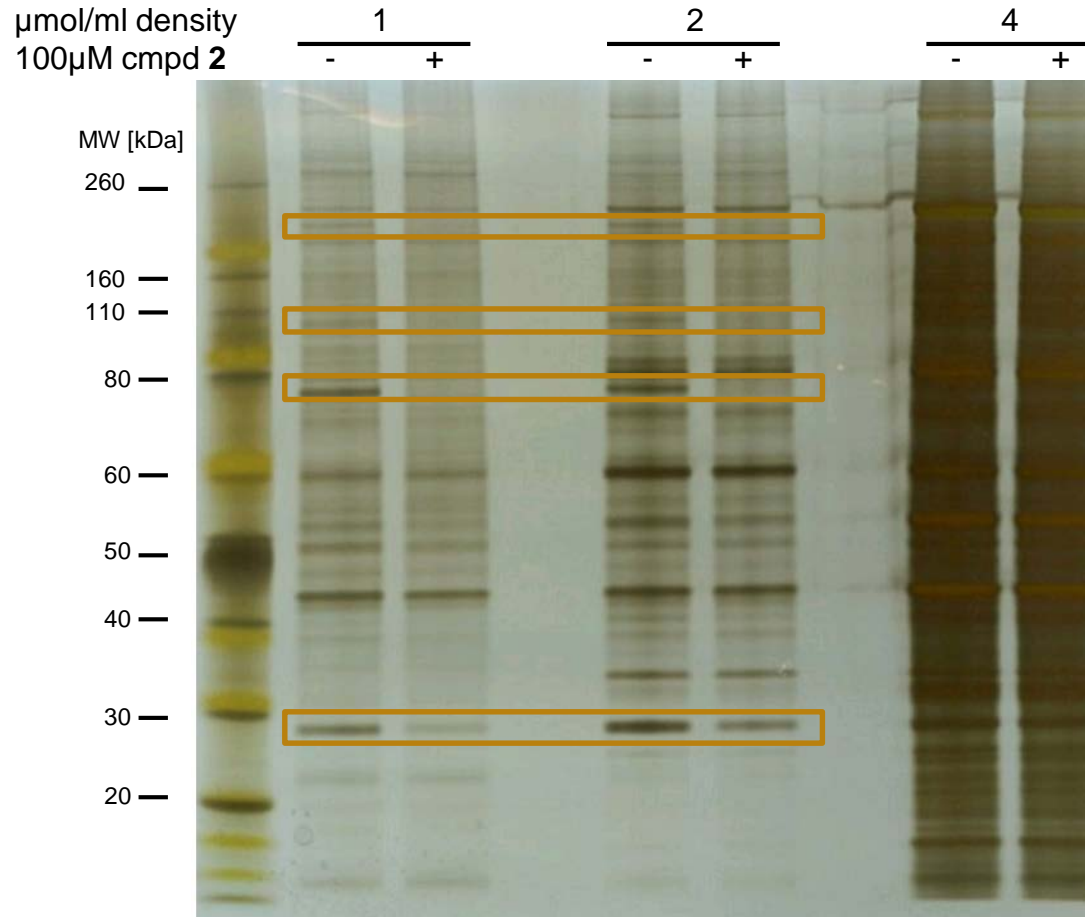

**Supplementary Figure 9:** Bioactive linker analog coupled to sepharose resin to give affinity matrix **6** incubated with NOMO-1 cell lysate. 1 and 2  $\mu$ mol/ml coupling densities allow for protein pull-down and competition by free compound **2** as observed by silver stain SDS-PAGE (n=1). Boxed bands indicate proteins specifically competed with free compound.

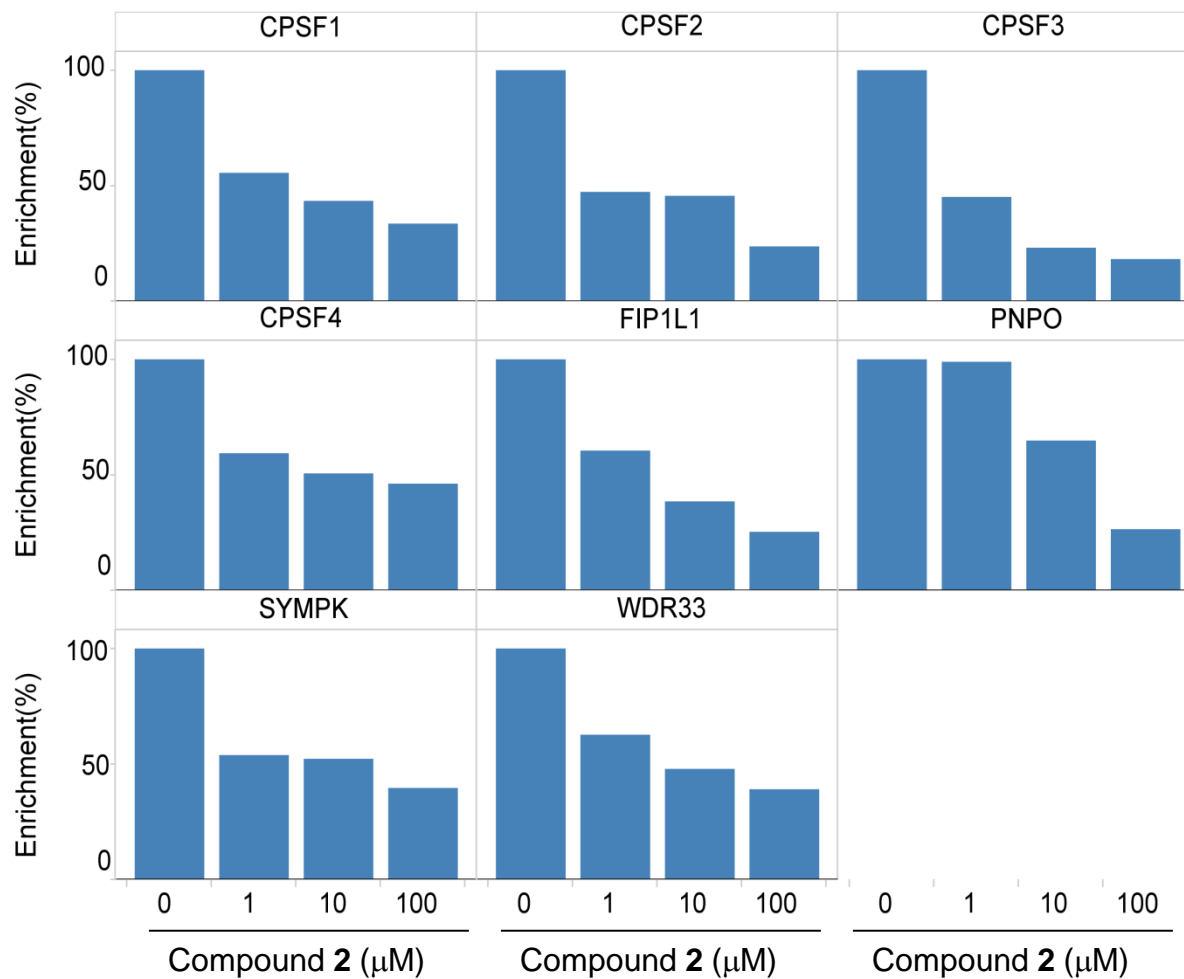

**Supplementary Figure 10:** Top hits from affinity pulldown experiment in NOMO-1 cells are concentration-dependent binders as determined by compound **2** competition with the affinity matrix **6**.

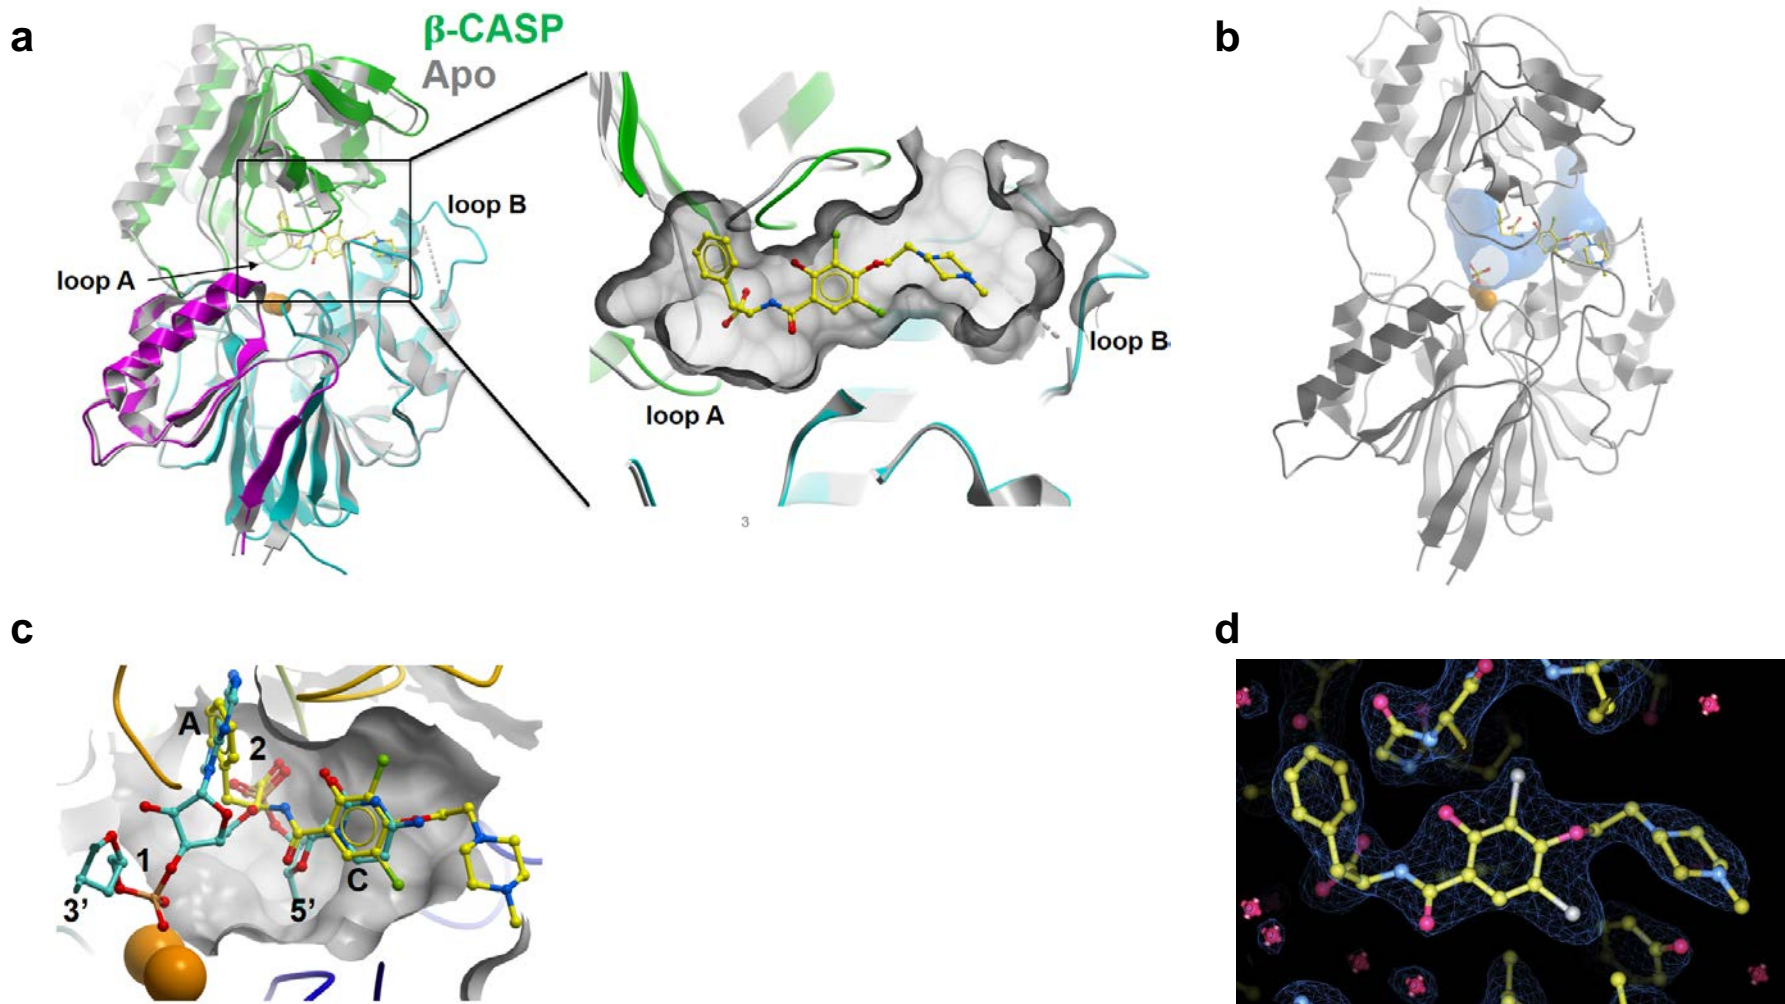

**Supplementary Figure 11:** CPSF3 co-crystal structure with compound **2**. **a**, Domain rotation and conformational changes of CPSF3 upon binding of **2** (yellow). Apo CPSF3 (pdb code 2I7T) is shown in ribbon representation in grey and CPSF3 bound to **2** is colored according to Figure 3a. The large metallo- $\beta$ -lactamase domains of both structures were aligned (grey and blue) and the  $\beta$ -CASP domains were allowed to move freely. Overall, the  $\beta$ -CASP domain (green) shows a 7.3 degree rotation upon binding of **2**. Loop regions lining the domain interfacial cavity show structural rearrangements upon ligand binding, the most significant changes were observed for loop A and B. **b**, Active site cavity (blue volume) in apo CPSF3. Position of compound **2** shown for comparison. A sulfate coordinates the two zinc ions. **c**, Model of a CA RNA fragment (cyan) bound to the active site of CPSF3. Phosphodiester 1 was overlaid with the zinc-coordinating phosphate observed in crystal structures of **2**-bound CPSF3. Phosphodiester 2 was placed at the carboxylate position of **2**. Adenine and cytosine were overlaid with the phenyl and hydroxy-dibromo-phenyl groups of **2**, respectively. **d**,  $2F_o - F_c$  electron density for compound **2** contoured at  $1.4\sigma$ .

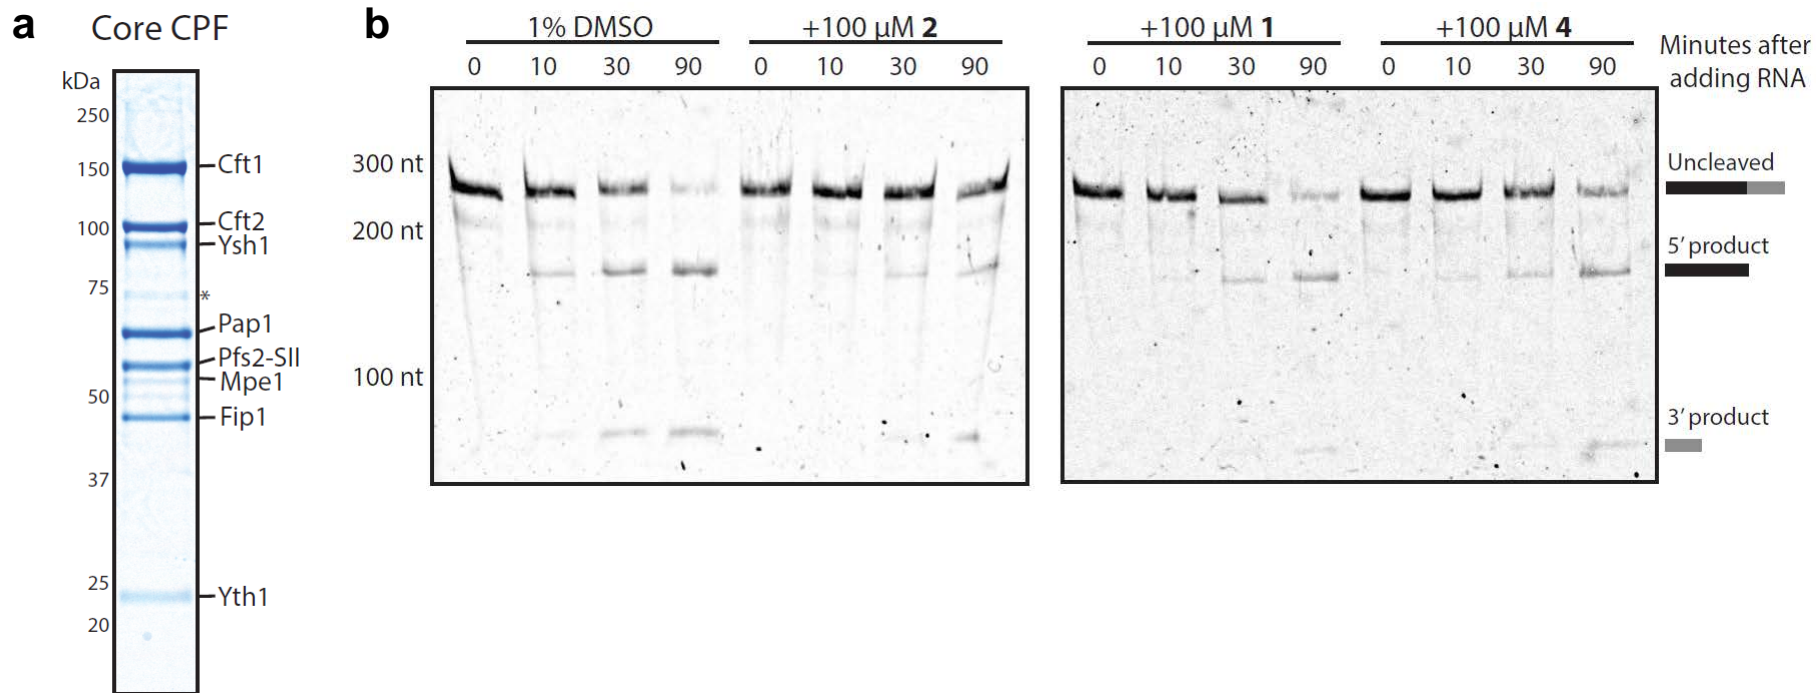

**Supplementary Figure 12:** Compound 2 inhibits the endonuclease activity of yeast core CPF. **a**, Recombinant 8-subunit core CPF complex was purified from insect cells. 5  $\mu$ l were resolved by SDS-PAGE and stained with Coomassie. **b**, 6% TBE-Urea PAGE gels of 259 nt *Cyc1* RNA substrate cleavage reactions treated with 100  $\mu$ M compound 2, 1, 4 or 1% DMSO. Gels were stained with SYBR Green II. Shown are one set of representative gels from three independent experiments.

**a**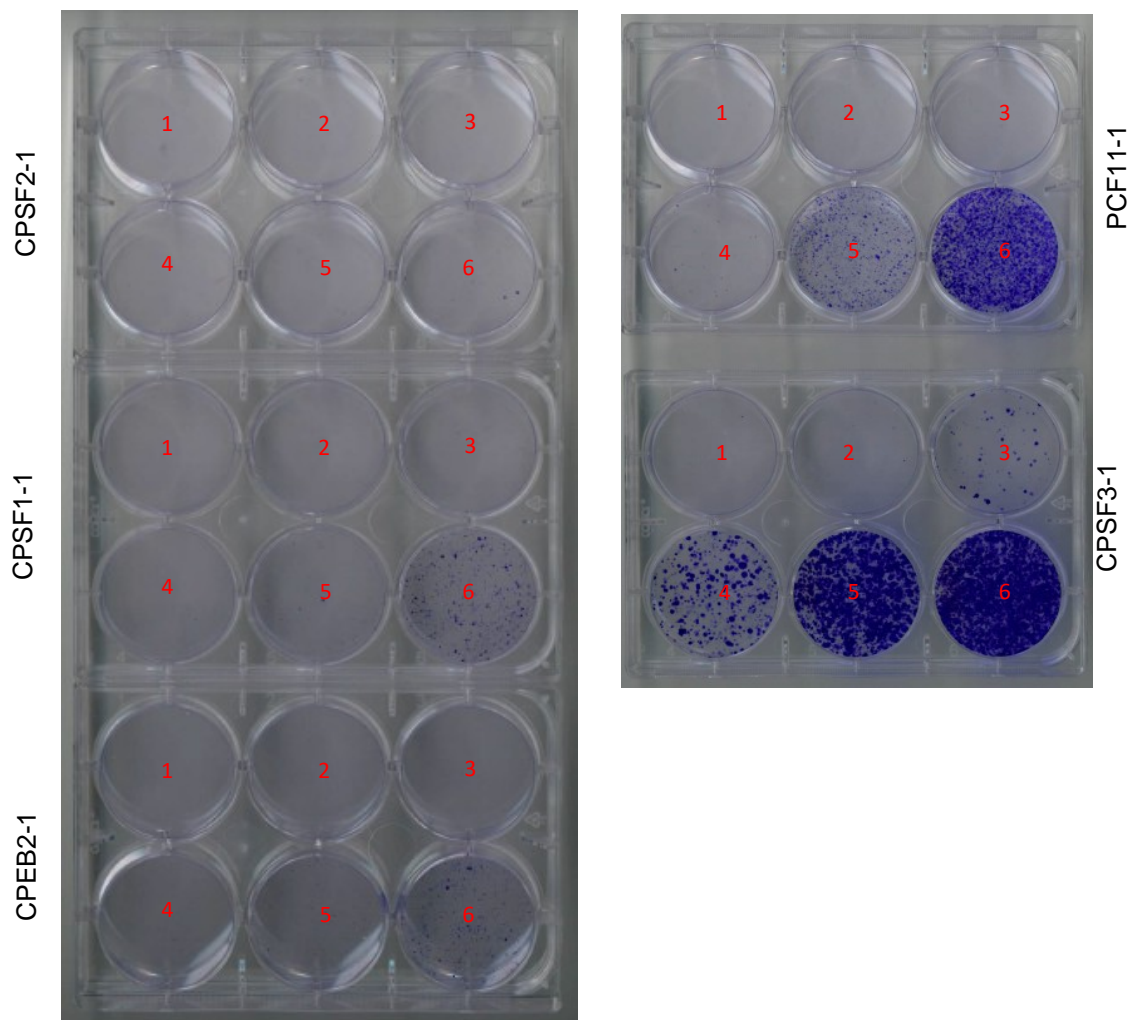

- Day 1: Seeded 8,000/well stably infected A-673 cells.
- Day 3: Added compound **1** in dose-response as indicated.
- Day 10: Fixed and stained cells.

| 6w-plate well number | Compound 1 ( $\mu\text{M}$ ) |
|----------------------|------------------------------|
| 1                    | 50                           |
| 2                    | 25                           |
| 3                    | 12.5                         |
| 4                    | 6.25                         |
| 5                    | 3.125                        |
| 6                    | 1.5625                       |

**Supplementary Figure 13: a**, Functional variomics of top 14 candidate compound targets in colony formation assays *in vitro* using A-673 cells treated with compound **1** as indicated (repeated independently two times).



**a**

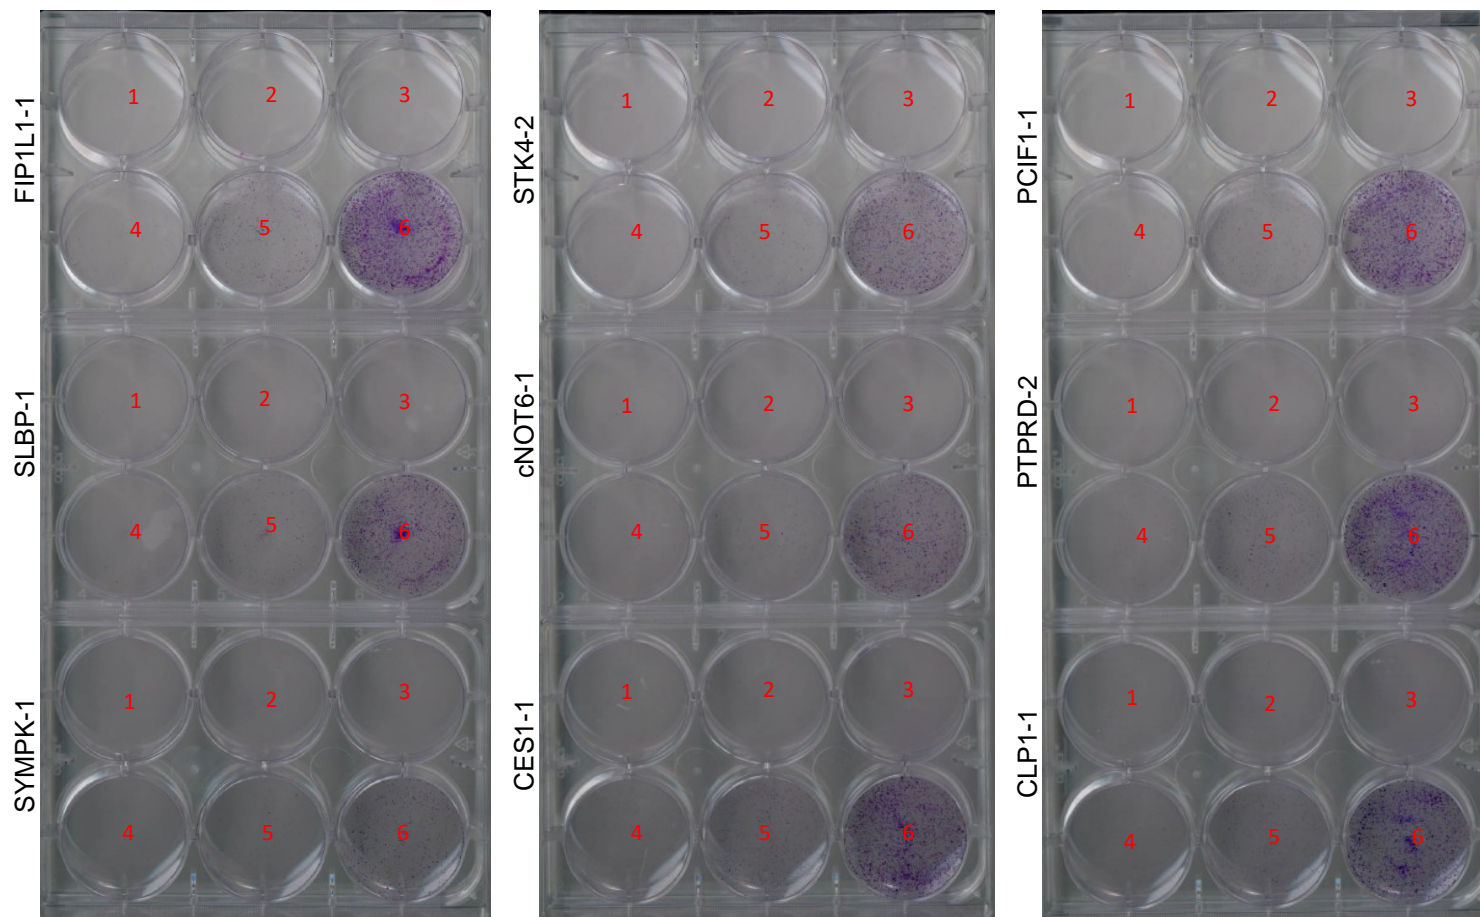

**Supplementary Figure 13 continued: a**, Functional variomics of top 14 candidate compound targets in colony formation assays *in vitro* using A-673 cells treated with compound **1** as indicated.

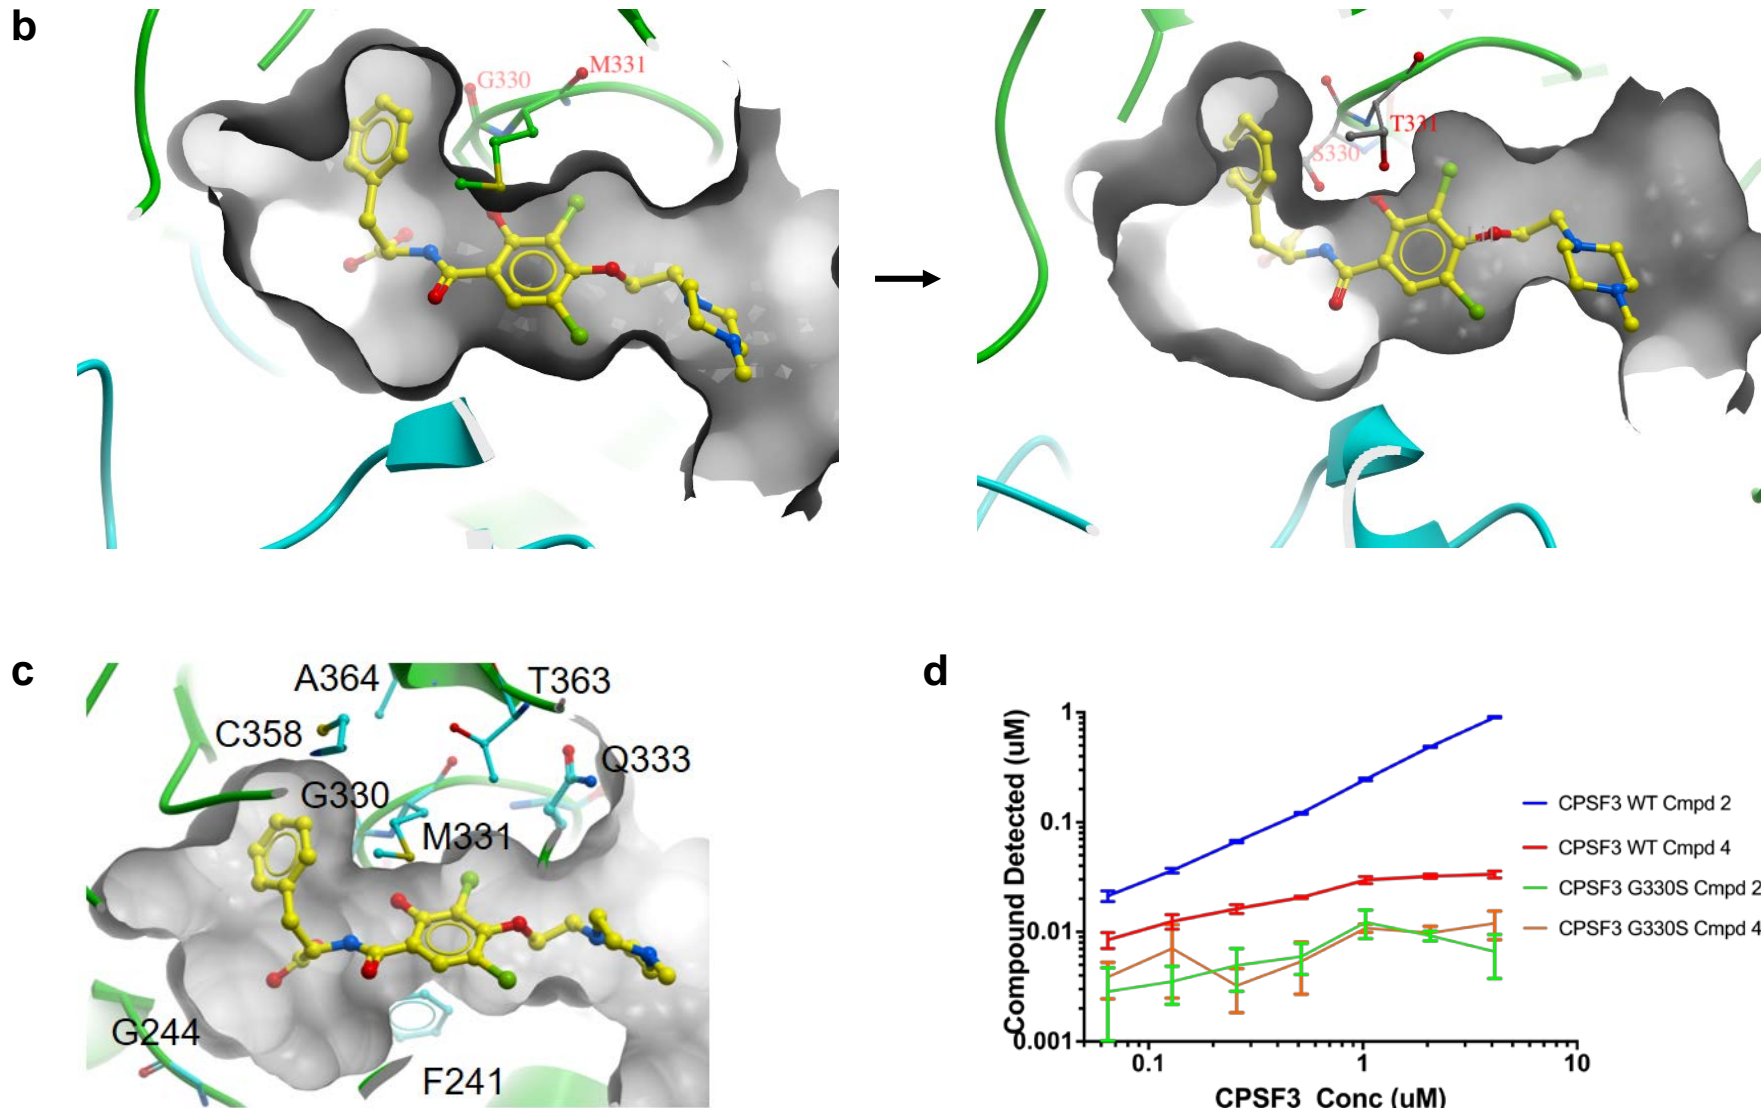

**Supplementary Figure 13 continued:** **b**, The two most prevalent missense mutations Gly330Ser, Met331Thr/Val modeled onto X-ray structure are predicted to constrict the compound **2** binding pocket while retaining catalytic activity. **c**, Positions of most frequently mutated residues (count > 4) cluster in the small  $\beta$ -CASP domain of CPSF3 (top), and are in close proximity to the binding site of **2**. **d**, Affinity binding measurement of compound **2** or **4** to human CPSF3 wild-type (WT) or G330S mutant protein as determined by SEC-TID. Error bars represent standard deviation of the mean (n=3).

**e**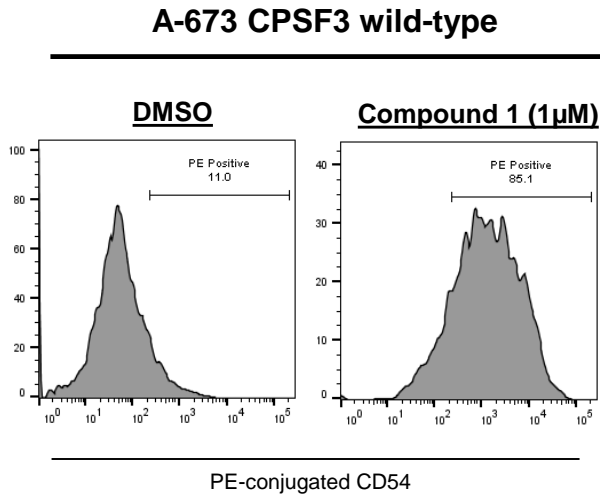**f**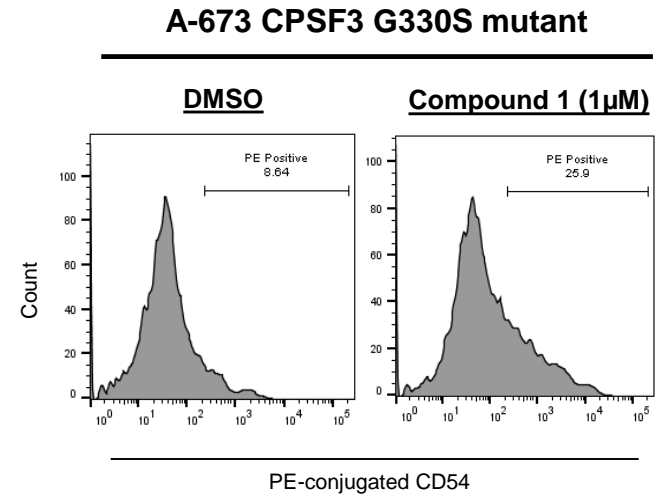

**Supplementary Figure 13 continued: e,f**, FACS analysis of cell surface CD54 expression in response to compound **1** treatment comparing (e) A-673 cells with CPSF3 wild-type to (f) variomics-derived A-673 cells expressing the CPSF3 G330S mutant (repeated independently two times).

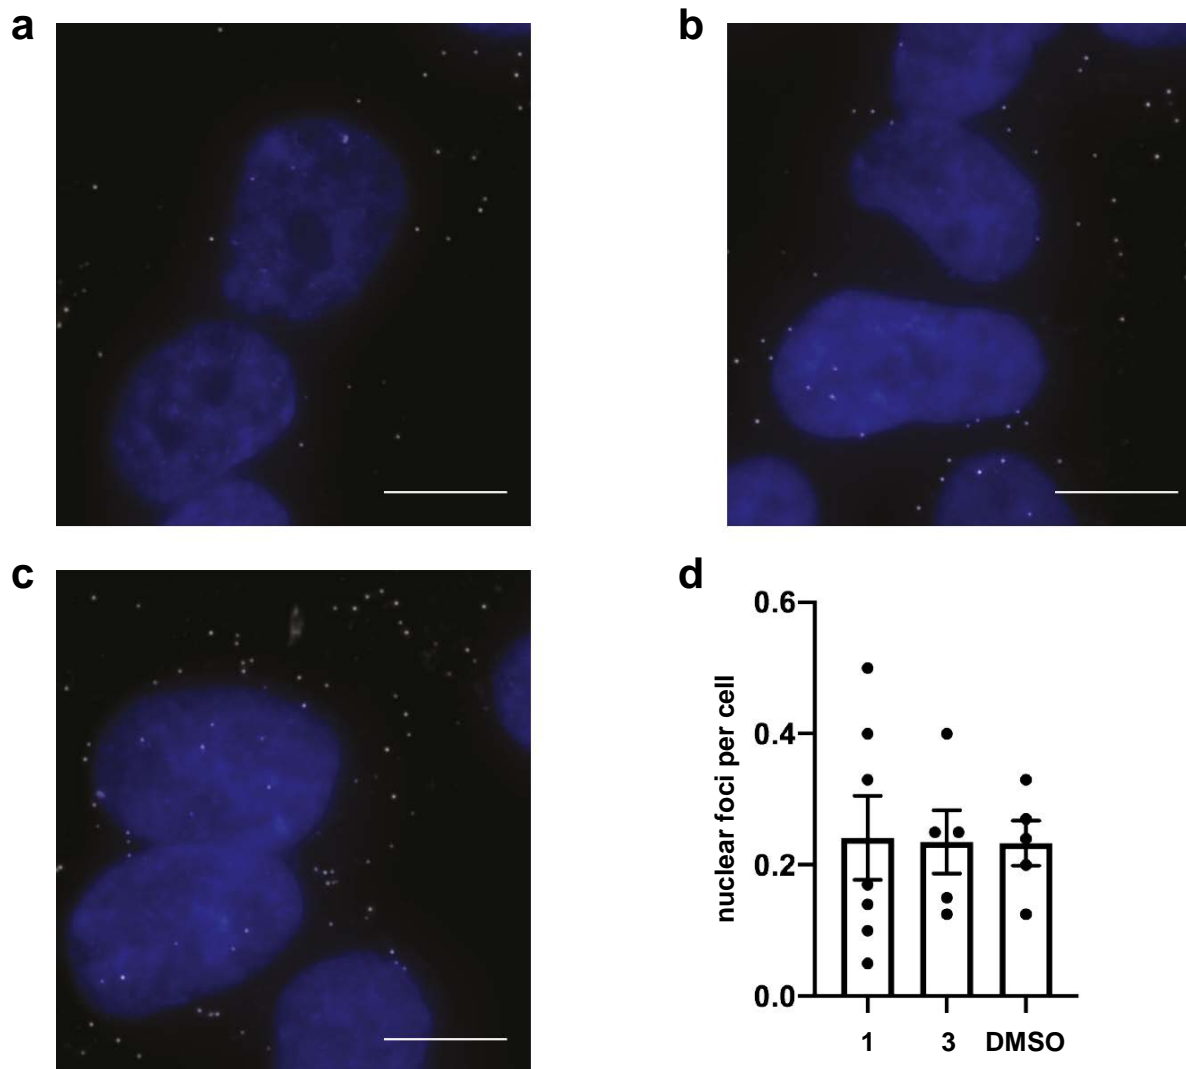

**Supplementary Figure 14:** a,b,c, Images of A-673 cells that were treated with compound **1** (a), compound **3** (b) or DMSO (c) for four hours prior to fixation and probed for RUNX-3 mRNAs (white) using FISH probes targeted to the coding sequence of the transcript. Nuclei (blue) were stained with DAPI. Images are representative from three independent experiments performed in duplicate. Scale bar = 10 μm. **d**, Similar numbers of nuclear foci of RUNX-3 transcripts were detected in cells treated with DMSO (52 cells), compound **1** (41 cells) or compound **3** (44 cells) (p-value 0.98, one-way ANOVA). Data are presented as mean plus/minus standard error of mean for nuclear foci counted in each experiment.

**a**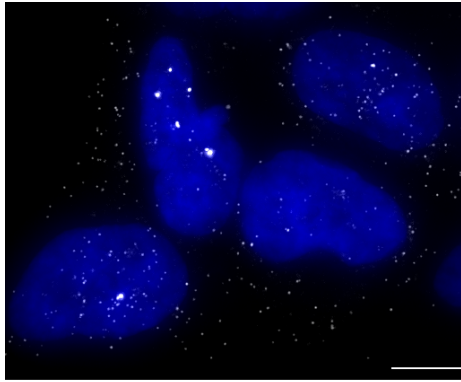**b**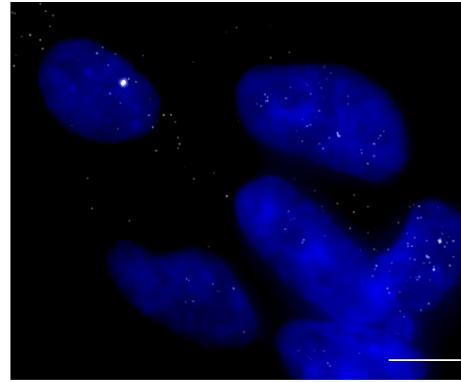**c**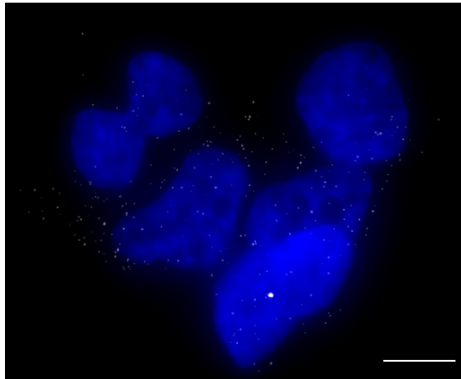**d**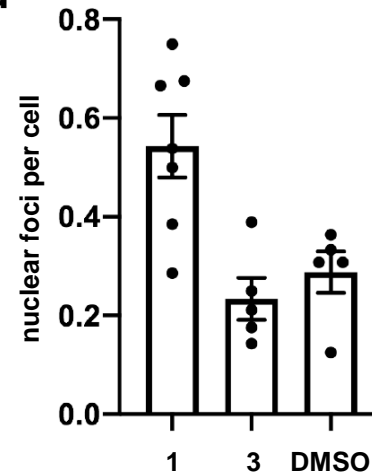

**Supplementary Figure 15:** **a,b,c**, Images of A-673 CPSF3 G330S cells that were treated with compound 1 (**a**), compound 3 (**b**) or DMSO (**c**) for 4 h prior to fixation and probed for NKX2-2 mRNAs (white) using FISH probes targeted to the coding sequence of the transcript. Nuclei (blue) were stained with DAPI. Images are representative from two independent experiments performed in duplicate. Scale bar = 10 $\mu$ m. **d**, Quantification of the number of NKX2-2 nuclear foci in cells treated with compound 1 (85 cells), compound 3 (80 cells) and DMSO (54 cells). Data are presented as mean plus/minus standard error of mean for nuclear foci counted in each experiment.

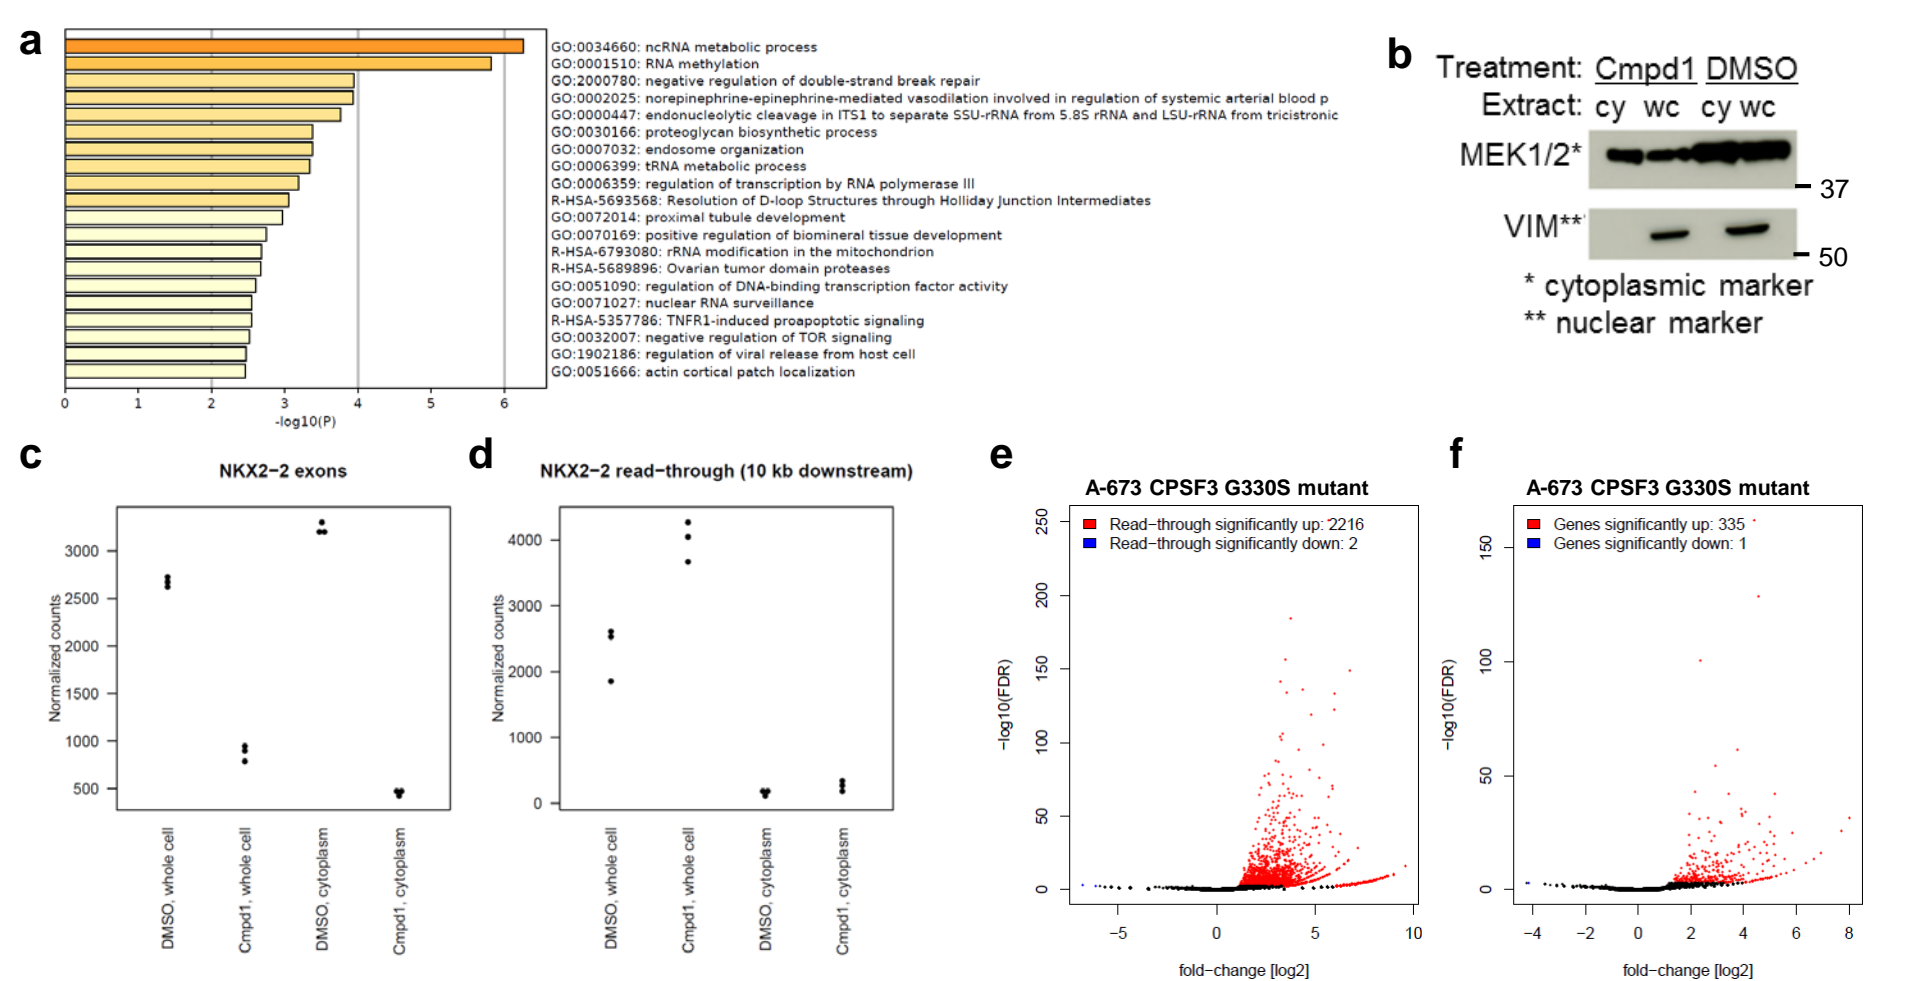

**Supplementary Figure 16:** **a**, Pathway and process enrichment using Metascape among genes significantly downregulated with 10 $\mu$ M compound **1** in A-673 cells based on RNA-seq expression profiling from whole cell extract (as shown in Figure 4g). Geneset enrichments were calculated using the hypergeometric test and Benjamini-Hochberg multiple comparison adjustment via Metascape. **b**, Protein expression analysis by Western blot against MEK1/2 as a cytoplasmic marker and Vimentin as a nuclear marker in cytoplasmic (cy) extracts or whole cell (wc) extracts to assess purity of subcellular fractionation (n=1). An uncropped scan of this blot is provided in Supplemental Figure 21b. **c,d**, NKX2-2 exonic (**c**) versus read-through (**d**) expression levels quantified by RNA-seq in A-673 cells treated with **1** or DMSO for 4 h prior to RNA purification from either whole cell or cytoplasmic extracts, with three biological replicates per condition. **e,f**, RNA-seq based quantification of (**e**) read-through expression genome-wide and of (**f**) changes in global gene expression in A-673 Variomics-derived CPSF3 G330S mutant cells, upon 4 h treatment with 10  $\mu$ M **1** versus DMSO analyzing RNA purified from whole cell extracts of three biological replicates. Normalized read counts were analyzed using a negative binomial generalized log-linear model with two-sided comparisons and false discovery rate controlled using Benjamini-Hochberg multiple comparisons adjustment via edgeR. Significance cut-offs defined as absolute value fold-change [log<sub>2</sub>] > 1 and adjusted p-val/FDR < 0.05.

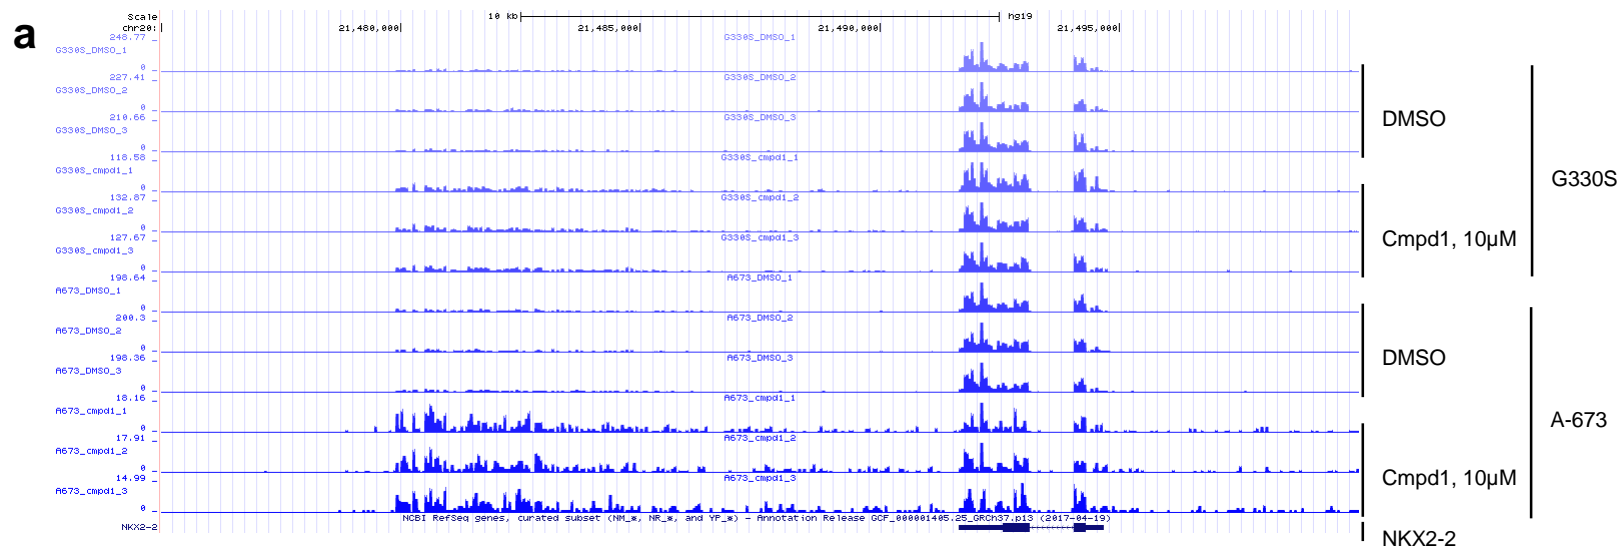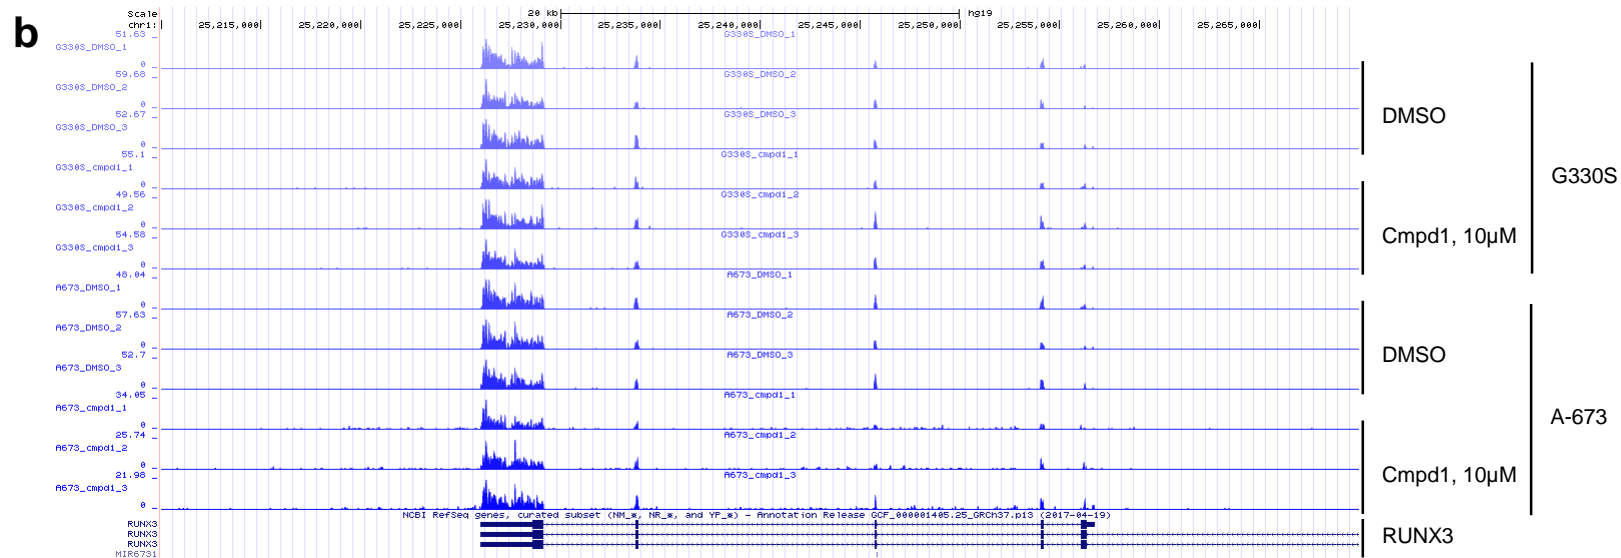

**Supplementary Figure 17:** RNA-seq traces comparing 4h compound **1** treatment (10µM) to DMSO control in either A-673 or CPSF3 G330S mutant expressing cells. Dynamic scaling of y-axis to visualize degree of transcript read-through at 3'-UTR and beyond in relation to read coverage at exons. **a**, NKX2-2 locus, hg19 chr20:chr20:21,475,000-21,500,000 and **b**, RUNX3 locus, hg19 chr1:25,210,000-25,270,000. Three separate tracks are shown per condition reflecting replicate samples.

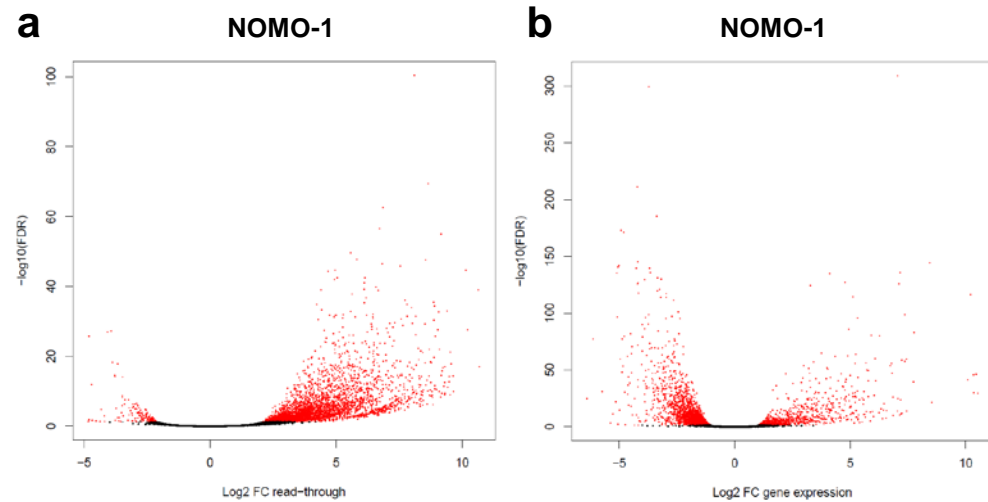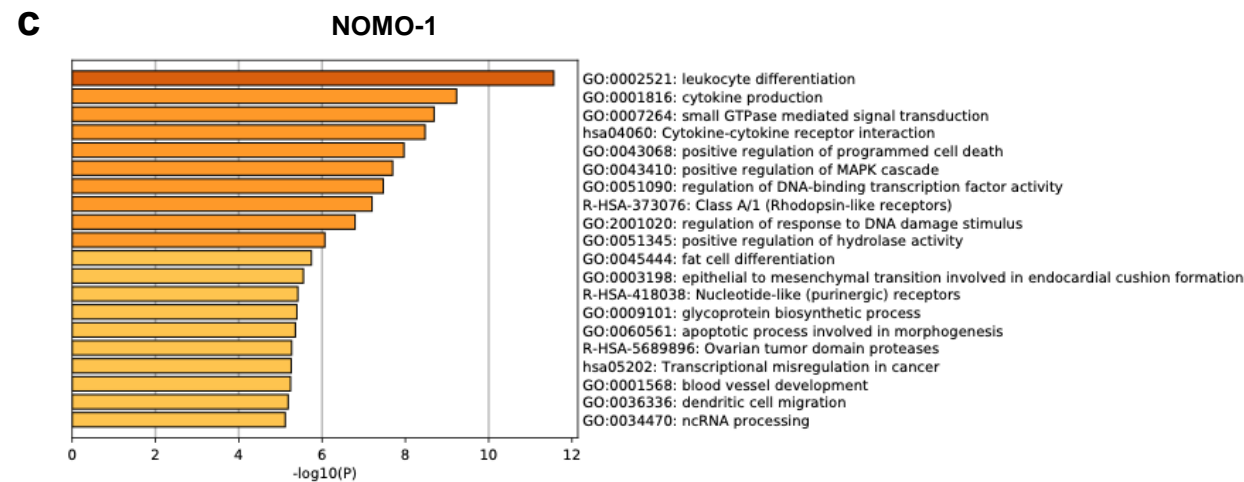

**Supplementary Figure 18:** **a,b**, RNA-seq based quantification in NOMO-1 cells of read-through expression genome-wide (**a**) and of changes in global gene expression in (**b**), both upon 4 h treatment with 10 $\mu$ M of **1** versus DMSO. Normalized read counts were analyzed using a negative binomial generalized log-linear model with two-sided comparisons and false discovery rate controlled using Benjamini-Hochberg multiple comparisons adjustment via edgeR. Significance cut-offs marked in red defined as absolute value fold-change [ $\log_2$ ] > 1 and adjusted p-val/FDR < 0.05. **c**, Pathway and process enrichment using Metascape among genes significantly downregulated with 10 $\mu$ M compound 1 in NOMO-1 cells. Geneset enrichments were calculated using the hypergeometric test and Benjamini-Hochberg multiple comparison adjustment via Metascape. All analyses utilized RNA purified from whole cell extracts of three biological replicates.



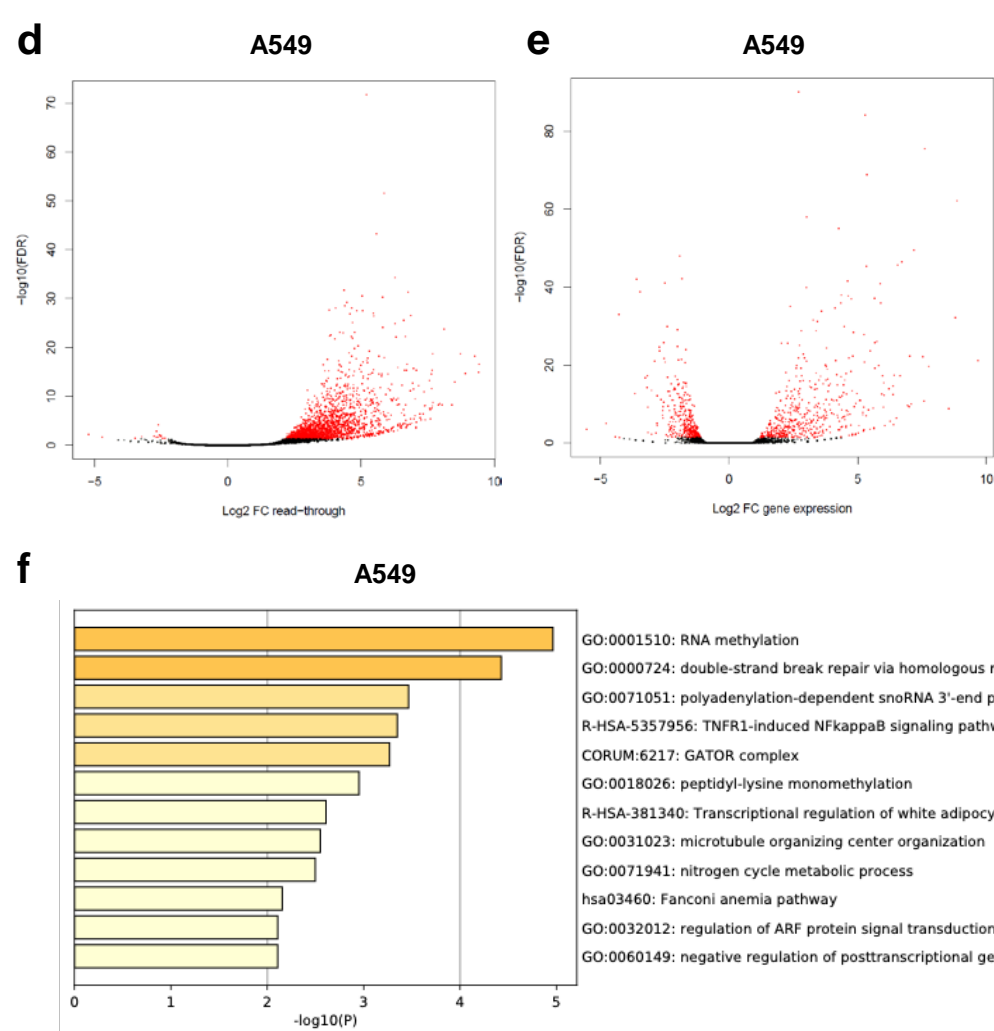

**Supplementary Figure 18 continued: d,e**, RNA-seq based quantification in A549 cells of read-through expression genome-wide (**d**) and of changes in global gene expression in (**e**), both upon 4 h treatment with 10 $\mu$ M of **1** versus DMSO. Normalized read counts were analyzed using a negative binomial generalized log-linear model with two-sided comparisons and false discovery rate controlled using Benjamini-Hochberg multiple comparisons adjustment via edgeR. Significance cut-offs marked in red defined as absolute value fold-change [ $\log_2$ ] > 1 and adjusted p-value/FDR < 0.05. **f**, Pathway and process enrichment using Metascape among genes significantly downregulated with 10 $\mu$ M compound **1** in A549 cells. Geneset enrichments were calculated using the hypergeometric test and Benjamini-Hochberg multiple comparison adjustment via Metascape. All analyses utilized RNA purified from whole cell extracts of three biological replicates

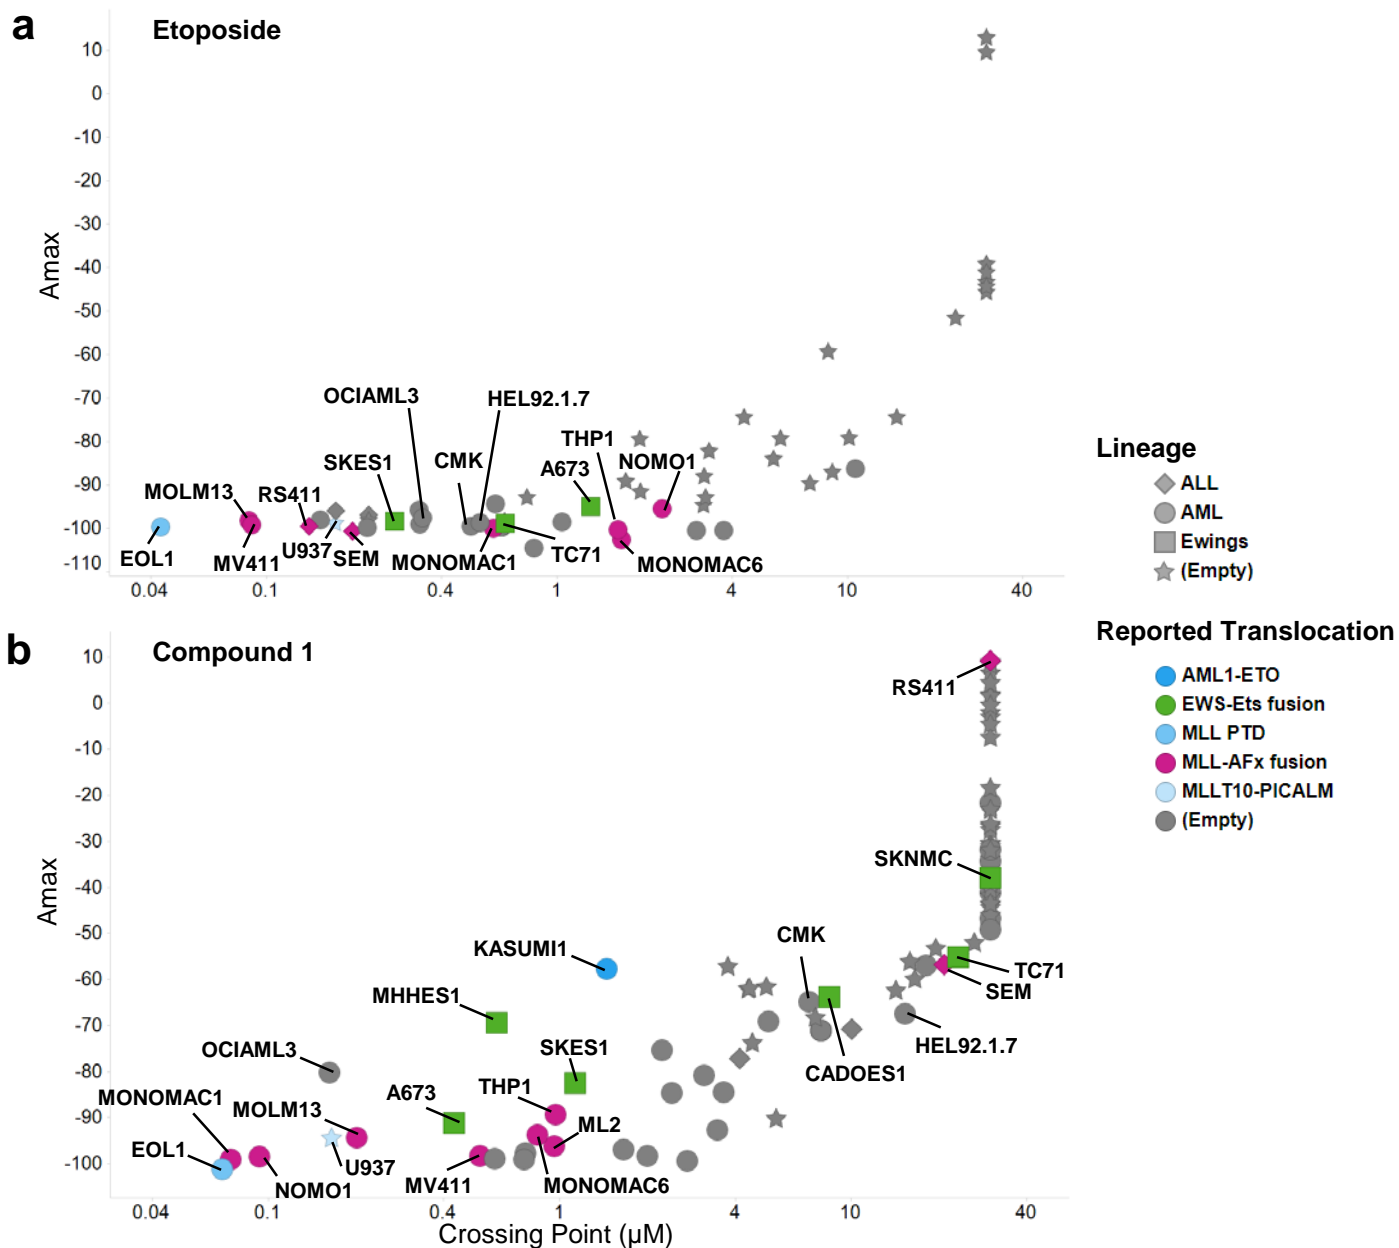

**Supplementary Figure 19: a,b**, Cell viability profile for (a) etoposide, analogous to experiment shown in Figure 1b for compound 1 and replotted here as (b). Note, the etoposide cell line panel was overlapping but did not include all 92 lines tested for compound 1. Cell lines are shape-coded by lineage and color-coded by reported translocation. Lineage is given as ALL, AML, Ewing's or Other (Empty). Note: EWS-FLI1 translocated Ewing's lines TC71 and SKNMC have low CES1 expression.

MOLM-13  $\alpha$ -cMYC

MOLM-13  $\alpha$ -cMYB

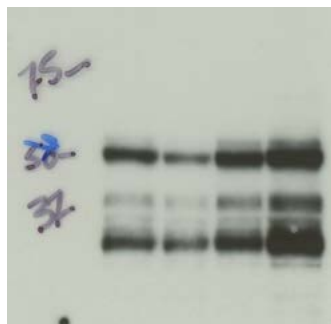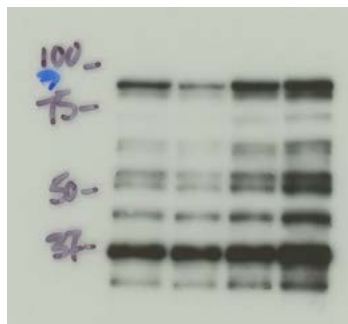

NOMO-1  $\alpha$ -cMYC

NOMO-1  $\alpha$ -cMYB

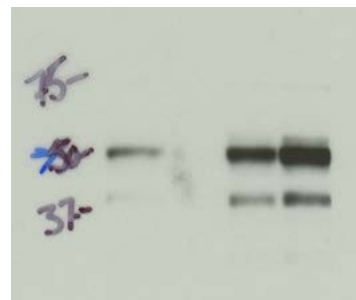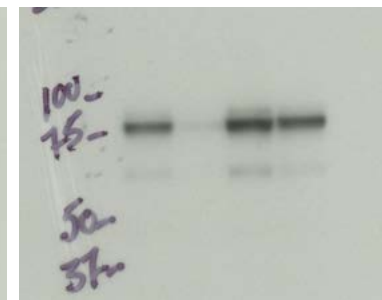

HEL 92.1.7  $\alpha$ -cMYB

HEL92.1.7  $\alpha$ -cMYC

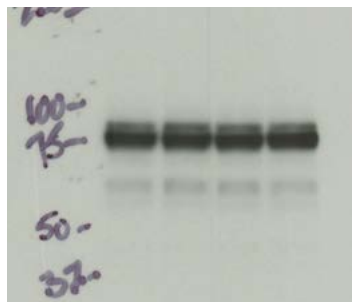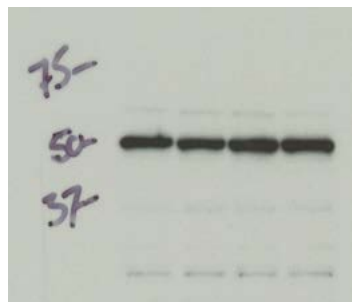

MOLM-13, Nomo-1, HEL 92.1.7, all with  $\alpha$ - $\beta$ -ACTIN

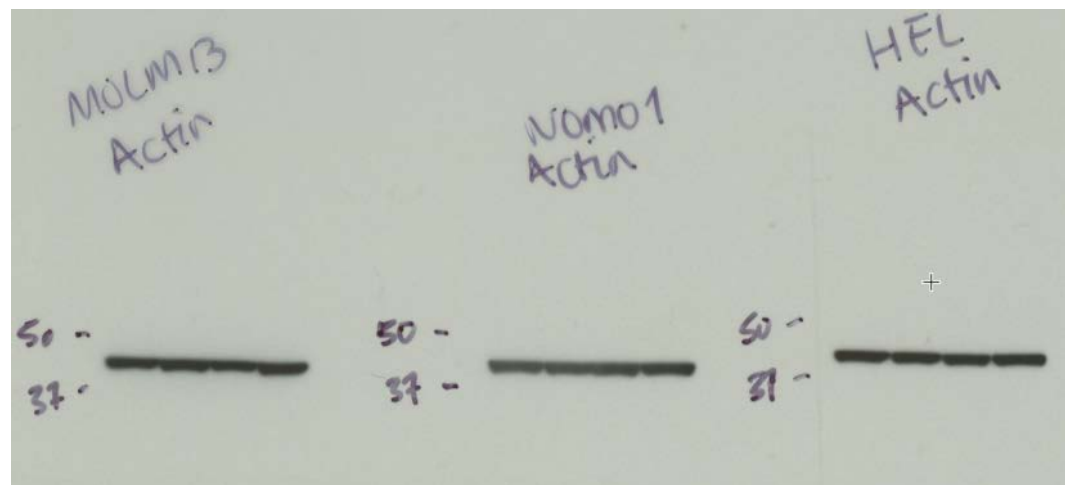

**Supplementary Figure 20:** Uncropped western blots for Supplementary Figure 2c. Sample order for all blots: Compound 1 1 $\mu$ M, Compound 1 10 $\mu$ M, Compound 3 10 $\mu$ M; DMSO

**a**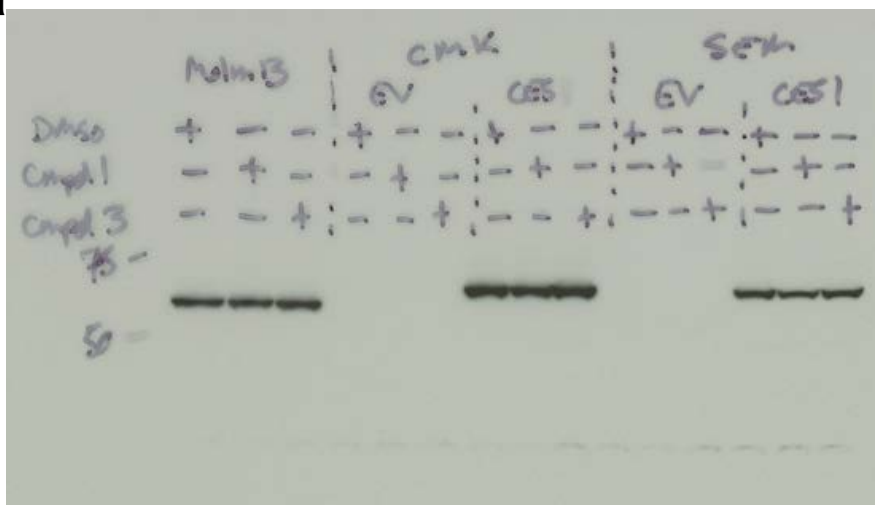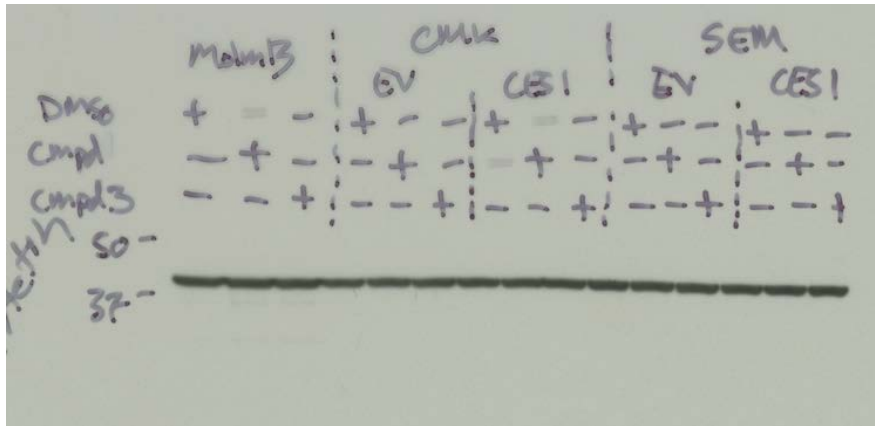**b**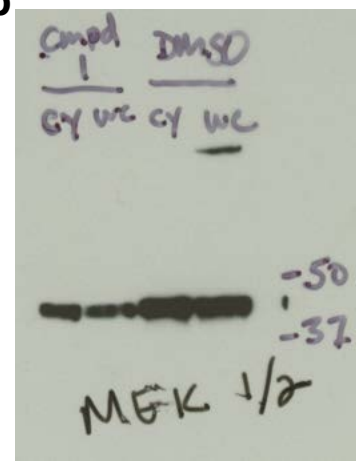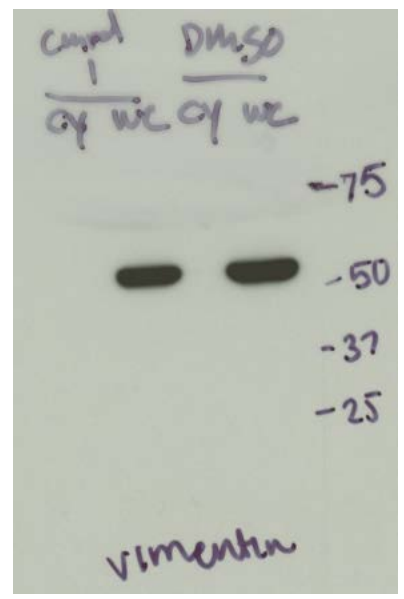

**Supplementary Figure 21:** **a**, Uncropped western blots for Supplementary Figure 8a (top: anti-CES1; bottom: anti- $\beta$ -ACTIN). **b**, uncropped western blot for Supplementary Figure 16b (right: anti-MEK1/2; left: anti-VIMENTIN)

### **List of Supplementary Tables:**

**Supplementary Table 1: Panel of 92 cancer cell lines used in this study.**

**Supplementary Table 2: X-ray data collection and refinement statistics.**

**Supplementary Table 3: Antibodies used in this study.**

**Supplementary Table 4: smFISH probes used in this study.**

### **Supplementary Notes**

**Supplementary Note- Synthetic Procedures: Chemical Synthesis Materials, General Spectroscopic Methods and Preparation of Compounds & Proton and Carbon NMR spectra compound 2, 3, 4, 5 and 7**

### **List of Supplementary Data Sets provided as individual Excel files**

**Supplementary Data Set 1: siRNA library.**

**Supplementary Data Set 2: siRNA plus cmpd 1 synergy screen gene level activity per compound 1, or DMSO, or differential.**

**Supplementary Data Set 3: Chemoproteomics data.**

**Supplementary Data Set 4: PAL data.**



**Supplementary Table 2** X-ray data collection and refinement statistics for CPSF3-compound **2** co-crystal structure

|                                                     | CPSF3/compound <b>2</b><br>(pdb code: 6M8Q) |
|-----------------------------------------------------|---------------------------------------------|
| <b>Data collection</b>                              |                                             |
| Space group                                         | P4 <sub>3</sub> 2 <sub>1</sub> 2            |
| Cell dimensions                                     |                                             |
| <i>a</i> , <i>b</i> , <i>c</i> (Å)                  | 106.2, 106.2, 206.0                         |
| $\alpha$ , $\beta$ , $\gamma$ (°)                   | 90, 90, 90                                  |
| Resolution (Å)                                      | 2.49 – 90 (2.49 – 2.51)                     |
| <i>R</i> <sub>merge</sub>                           | 0.138 (1.27)                                |
| <i>R</i> <sub>pim</sub>                             | 0.056 (0.507)                               |
| CC <sub>1/2</sub>                                   | 0.996 (0.652)                               |
| <i>I</i> / $\sigma$ <i>I</i>                        | 12.6 (2.2)                                  |
| Completeness (%)                                    | 99.7 (99.7)                                 |
| Redundancy                                          | 7.1 (7.1)                                   |
| <b>Refinement</b>                                   |                                             |
| Resolution (Å)                                      | 2.49                                        |
| No. reflections                                     | 41,852                                      |
| <i>R</i> <sub>work</sub> / <i>R</i> <sub>free</sub> | 0.175 / 0.221                               |
| No. atoms                                           |                                             |
| Protein                                             | 7,255                                       |
| Ligand/ion                                          | 84                                          |
| Water                                               | 495                                         |
| <i>B</i> -factors                                   |                                             |
| Protein                                             | 51.7                                        |
| Ligand/ion                                          | 50.5                                        |
| Water                                               | 56.1                                        |
| R.m.s. deviations                                   |                                             |
| Bond lengths (Å)                                    | 0.010                                       |
| Bond angles (°)                                     | 1.18                                        |

Only one crystal was needed to obtain the structure. Highest-resolution shell is shown in parentheses.

**Supplementary Table 3: Antibodies used in this study**

| Antibody (epitope)         | Manufacturer                | Catalog Number | Application     | Lot Number | Dilution      | Link to manufacturer's validation data                                                                                                                                                                                                                                              |
|----------------------------|-----------------------------|----------------|-----------------|------------|---------------|-------------------------------------------------------------------------------------------------------------------------------------------------------------------------------------------------------------------------------------------------------------------------------------|
| PE-conjugated CD11b        | BioLegend                   | 301306         | FACS            | B183220    | 5ul/1E6 cells | <a href="https://www.biolegend.com/en-us/products/pe-anti-human-cd11b-antibody-768">https://www.biolegend.com/en-us/products/pe-anti-human-cd11b-antibody-768</a>                                                                                                                   |
| PE-conjugated CD44         | BioLegend                   | 338808         | FACS            | B189534    | 5ul/1E6 cells | <a href="https://www.biolegend.com/en-us/products/pe-anti-human-cd44-antibody-5745">https://www.biolegend.com/en-us/products/pe-anti-human-cd44-antibody-5745</a>                                                                                                                   |
| PE-conjugated CD54         | BioLegend                   | 353106         | FACS            | B169127    | 5ul/1E6 cells | <a href="https://www.biolegend.com/en-us/products/pe-anti-human-cd54-antibody-7447">https://www.biolegend.com/en-us/products/pe-anti-human-cd54-antibody-7447</a>                                                                                                                   |
| PE-conjugated CD73         | BioLegend                   | 344004         | FACS            | B189876    | 5ul/1E6 cells | <a href="https://www.biolegend.com/en-us/products/pe-anti-human-cd73-ecto-5-nucleotidase-antibody-6092">https://www.biolegend.com/en-us/products/pe-anti-human-cd73-ecto-5-nucleotidase-antibody-6092</a>                                                                           |
| Alexa 568 goat anti mouse  | ThermoFisher Scientific     | A11031         | R-loop staining | 2026148    | 1:1000        | <a href="https://www.thermofisher.com/antibody/product/Goat-anti-Mouse-IgG-H-L-Highly-Cross-Adsorbed-Secondary-Antibody-Polyclonal/A-11031">https://www.thermofisher.com/antibody/product/Goat-anti-Mouse-IgG-H-L-Highly-Cross-Adsorbed-Secondary-Antibody-Polyclonal/A-11031</a>   |
| Alexa 647 goat anti rabbit | ThermoFisher Scientific     | A21245         | R-loop staining | 2051068    | 1:1000        | <a href="https://www.thermofisher.com/antibody/product/Goat-anti-Rabbit-IgG-H-L-Highly-Cross-Adsorbed-Secondary-Antibody-Polyclonal/A-21245">https://www.thermofisher.com/antibody/product/Goat-anti-Rabbit-IgG-H-L-Highly-Cross-Adsorbed-Secondary-Antibody-Polyclonal/A-21245</a> |
| Nucleolin                  | Abcam                       | ab22758        | R-loop staining | GR303746-3 | 1:1000        | <a href="https://www.abcam.com/nucleolin-antibody-ab22758.html">https://www.abcam.com/nucleolin-antibody-ab22758.html</a>                                                                                                                                                           |
| DNA-RNA Hybrid clone S9.6  | Millipore                   | MABE1095       | R-loop staining | 06131_4    | 1:200         | <a href="http://www.merckmillipore.com/CH/de/product/Anti-DNA-RNA-Hybrid-Antibody-clone-S9.6_MM_NF-MABE1095">http://www.merckmillipore.com/CH/de/product/Anti-DNA-RNA-Hybrid-Antibody-clone-S9.6_MM_NF-MABE1095</a>                                                                 |
| CPSF3                      | Abgent                      | AT1610a        | WB              | 11175      | 1:1000        | <a href="http://www.abgent.com/products/AT1610a-CPSF3-Antibody-monoclonal-M01">http://www.abgent.com/products/AT1610a-CPSF3-Antibody-monoclonal-M01</a>                                                                                                                             |
| FLI1                       | Abcam                       | ab124791       | WB              | YH112404C  | 1:1000        | <a href="https://www.abcam.com/fli1-antibody-epr4645-ab124791.html">https://www.abcam.com/fli1-antibody-epr4645-ab124791.html</a>                                                                                                                                                   |
| MEK1/2                     | Cell Signaling Technologies | 8727           | WB              | 5          | 1:1000        | <a href="https://www.cellsignal.com/products/primary-antibodies/mek1-2-d1a5-rabbit-mab/8727">https://www.cellsignal.com/products/primary-antibodies/mek1-2-d1a5-rabbit-mab/8727</a>                                                                                                 |
| MYB                        | Cell Signaling Technologies | 12319          | WB              | 1          | 1:1000        | <a href="https://www.cellsignal.com/products/primary-antibodies/c-myb-d2r4y-rabbit-mab/12319">https://www.cellsignal.com/products/primary-antibodies/c-myb-d2r4y-rabbit-mab/12319</a>                                                                                               |
| MYC                        | Cell Signaling Technologies | 13987          | WB              | 5          | 1:1000        | <a href="https://www.cellsignal.com/products/primary-antibodies/c-myc-d3n8f-rabbit-mab/13987">https://www.cellsignal.com/products/primary-antibodies/c-myc-d3n8f-rabbit-mab/13987</a>                                                                                               |
| NKX2.2                     | Abcam                       | ab187375       | WB              | GR299445-4 | 1:1000        | <a href="https://www.abcam.com/nkx22-antibody-nx2294-ab187375.html">https://www.abcam.com/nkx22-antibody-nx2294-ab187375.html</a>                                                                                                                                                   |
| VIMENTIN                   | Cell Signaling Technologies | 5741           | WB              | 1          | 1:1000        | <a href="https://www.cellsignal.com/products/primary-antibodies/vimentin-d21h3-xp-rabbit-mab/5741">https://www.cellsignal.com/products/primary-antibodies/vimentin-d21h3-xp-rabbit-mab/5741</a>                                                                                     |
| BETA-ACTIN                 | Sigma                       | A5441          | WB              | 127M4866V  | 1:10000       | <a href="https://www.sigmaaldrich.com/catalog/product/sigma/a5441">https://www.sigmaaldrich.com/catalog/product/sigma/a5441</a>                                                                                                                                                     |



**Supplementary Table 4: smFISH probes used in this study.**

| <b>FISH probe</b> | <b>Accession Number(s)</b>  | <b>Sequence</b>       | <b>Sequence Name</b> | <b>Three Modification</b> | <b>Three Lambda Max</b> |
|-------------------|-----------------------------|-----------------------|----------------------|---------------------------|-------------------------|
| NKX2-2 mRNA       | NM_002509.3                 | tagtttctaactccaggagg  | NKX2-2 mRNA_1        | Quasar 570                | 550 nm                  |
| NKX2-2 mRNA       | NM_002509.3                 | aaagcacgcggaaatggacg  | NKX2-2 mRNA_2        | Quasar 570                | 550 nm                  |
| NKX2-2 mRNA       | NM_002509.3                 | ttgtagcttcacttggtcaa  | NKX2-2 mRNA_3        | Quasar 570                | 550 nm                  |
| NKX2-2 mRNA       | NM_002509.3                 | ccccaaaattatgtcgcaa   | NKX2-2 mRNA_4        | Quasar 570                | 550 nm                  |
| NKX2-2 mRNA       | NM_002509.3                 | ttgtgttggtcagcgacatg  | NKX2-2 mRNA_5        | Quasar 570                | 550 nm                  |
| NKX2-2 mRNA       | NM_002509.3                 | caggtctaagatgctctga   | NKX2-2 mRNA_6        | Quasar 570                | 550 nm                  |
| NKX2-2 mRNA       | NM_002509.3                 | tcgtagaaggggttctcag   | NKX2-2 mRNA_7        | Quasar 570                | 550 nm                  |
| NKX2-2 mRNA       | NM_002509.3                 | cttgagcttgagctcgag    | NKX2-2 mRNA_8        | Quasar 570                | 550 nm                  |
| NKX2-2 mRNA       | NM_002509.3                 | ttgtcattgtccggtgactc  | NKX2-2 mRNA_9        | Quasar 570                | 550 nm                  |
| NKX2-2 mRNA       | NM_002509.3                 | ttggagaaaagcactcgccg  | NKX2-2 mRNA_10       | Quasar 570                | 550 nm                  |
| NKX2-2 mRNA       | NM_002509.3                 | tggaaccagatctgactcg   | NKX2-2 mRNA_11       | Quasar 570                | 550 nm                  |
| NKX2-2 mRNA       | NM_002509.3                 | cttcactctgtagcgggtgt  | NKX2-2 mRNA_12       | Quasar 570                | 550 nm                  |
| NKX2-2 mRNA       | NM_002509.3                 | tgagcgcgtgacatggttg   | NKX2-2 mRNA_13       | Quasar 570                | 550 nm                  |
| NKX2-2 mRNA       | NM_002509.3                 | ttgtactgcatgtctgcag   | NKX2-2 mRNA_14       | Quasar 570                | 550 nm                  |
| NKX2-2 mRNA       | NM_002509.3                 | tagtggagccgagagtcac   | NKX2-2 mRNA_15       | Quasar 570                | 550 nm                  |
| NKX2-2 mRNA       | NM_002509.3                 | aatctgccactccaaggaga  | NKX2-2 mRNA_16       | Quasar 570                | 550 nm                  |
| NKX2-2 mRNA       | NM_002509.3                 | ctgtaaacacggcgtagagt  | NKX2-2 mRNA_17       | Quasar 570                | 550 nm                  |
| NKX2-2 mRNA       | NM_002509.3                 | agaagcgaagctgcgcaaac  | NKX2-2 mRNA_18       | Quasar 570                | 550 nm                  |
| NKX2-2 mRNA       | NM_002509.3                 | gacgacattaacctgggac   | NKX2-2 mRNA_19       | Quasar 570                | 550 nm                  |
| NKX2-2 mRNA       | NM_002509.3                 | ggctttttctctgtttcaa   | NKX2-2 mRNA_20       | Quasar 570                | 550 nm                  |
| NKX2-2 mRNA       | NM_002509.3                 | gctgacaatcgtctactca   | NKX2-2 mRNA_21       | Quasar 570                | 550 nm                  |
| NKX2-2 mRNA       | NM_002509.3                 | cagaactgtttacatggccat | NKX2-2 mRNA_22       | Quasar 570                | 550 nm                  |
| NKX2-2 mRNA       | NM_002509.3                 | aaagcgaatctgccaccag   | NKX2-2 mRNA_23       | Quasar 570                | 550 nm                  |
| NKX2-2 mRNA       | NM_002509.3                 | tcaccaccgatattacaac   | NKX2-2 mRNA_24       | Quasar 570                | 550 nm                  |
| NKX2-2 mRNA       | NM_002509.3                 | cctgaaggtcattttggcaa  | NKX2-2 mRNA_25       | Quasar 570                | 550 nm                  |
| NKX2-2 mRNA       | NM_002509.3                 | agaagagagttggaccacaga | NKX2-2 mRNA_26       | Quasar 570                | 550 nm                  |
| NKX2-2 mRNA       | NM_002509.3                 | aatagctgagctccaagttc  | NKX2-2 mRNA_27       | Quasar 570                | 550 nm                  |
| RUNX3_Var1_Var2   | NM_001031680.2; NM_004350.2 | cggagttagttctctcattg  | RUNX3_Var1_Var2_1    | Quasar 570                | 550 nm                  |
| RUNX3_Var1_Var2   | NM_001031680.2; NM_004350.2 | gaagcgaagtcgttgaacc   | RUNX3_Var1_Var2_2    | Quasar 570                | 550 nm                  |
| RUNX3_Var1_Var2   | NM_001031680.2; NM_004350.2 | atggtcagggtgaaactctt  | RUNX3_Var1_Var2_3    | Quasar 570                | 550 nm                  |
| RUNX3_Var1_Var2   | NM_001031680.2; NM_004350.2 | tcggagaatgggttcagttc  | RUNX3_Var1_Var2_4    | Quasar 570                | 550 nm                  |
| RUNX3_Var1_Var2   | NM_001031680.2; NM_004350.2 | ggaagagcgggtcaactgg   | RUNX3_Var1_Var2_5    | Quasar 570                | 550 nm                  |
| RUNX3_Var1_Var2   | NM_001031680.2; NM_004350.2 | catgagaactgtaggagc    | RUNX3_Var1_Var2_6    | Quasar 570                | 550 nm                  |
| RUNX3_Var1_Var2   | NM_001031680.2; NM_004350.2 | catcactggtcttgaagtt   | RUNX3_Var1_Var2_7    | Quasar 570                | 550 nm                  |
| RUNX3_Var1_Var2   | NM_001031680.2; NM_004350.2 | taacctatgcctctgtacaa  | RUNX3_Var1_Var2_8    | Quasar 570                | 550 nm                  |
| RUNX3_Var1_Var2   | NM_001031680.2; NM_004350.2 | gaagtatgggatgagacggc  | RUNX3_Var1_Var2_9    | Quasar 570                | 550 nm                  |
| RUNX3_Var1_Var2   | NM_001031680.2; NM_004350.2 | catagctggagacagtgagg  | RUNX3_Var1_Var2_10   | Quasar 570                | 550 nm                  |
| RUNX3_Var1_Var2   | NM_001031680.2; NM_004350.2 | ctctctggaagagatggc    | RUNX3_Var1_Var2_11   | Quasar 570                | 550 nm                  |
| RUNX3_Var1_Var2   | NM_001031680.2; NM_004350.2 | ccaacagtttaggaacggagg | RUNX3_Var1_Var2_12   | Quasar 570                | 550 nm                  |
| RUNX3_Var1_Var2   | NM_001031680.2; NM_004350.2 | tgatgccatgactcactt    | RUNX3_Var1_Var2_13   | Quasar 570                | 550 nm                  |
| RUNX3_Var1_Var2   | NM_001031680.2; NM_004350.2 | tgcttctgggtttaagaa    | RUNX3_Var1_Var2_14   | Quasar 570                | 550 nm                  |
| RUNX3_Var1_Var2   | NM_001031680.2; NM_004350.2 | ctggtaagtgcatggagga   | RUNX3_Var1_Var2_15   | Quasar 570                | 550 nm                  |
| RUNX3_Var1_Var2   | NM_001031680.2; NM_004350.2 | gaacagagatggtgagcgtt  | RUNX3_Var1_Var2_16   | Quasar 570                | 550 nm                  |
| RUNX3_Var1_Var2   | NM_001031680.2; NM_004350.2 | aaaatgatccctcactcaa   | RUNX3_Var1_Var2_17   | Quasar 570                | 550 nm                  |
| RUNX3_Var1_Var2   | NM_001031680.2; NM_004350.2 | cagggacattgatgtctgac  | RUNX3_Var1_Var2_18   | Quasar 570                | 550 nm                  |

|                 |                             |                      |                    |            |        |
|-----------------|-----------------------------|----------------------|--------------------|------------|--------|
| RUNX3_Var1_Var2 | NM_001031680.2; NM_004350.2 | tcgcaagattggctggatc  | RUNX3_Var1_Var2_19 | Quasar 570 | 550 nm |
| RUNX3_Var1_Var2 | NM_001031680.2; NM_004350.2 | ctatttgccttcagagcaca | RUNX3_Var1_Var2_20 | Quasar 570 | 550 nm |
| RUNX3_Var1_Var2 | NM_001031680.2; NM_004350.2 | tacctgtaagagactctgtg | RUNX3_Var1_Var2_21 | Quasar 570 | 550 nm |
| RUNX3_Var1_Var2 | NM_001031680.2; NM_004350.2 | gcggggatgttgcctataat | RUNX3_Var1_Var2_22 | Quasar 570 | 550 nm |
| RUNX3_Var1_Var2 | NM_001031680.2; NM_004350.2 | tagcccttgagaaagtatt  | RUNX3_Var1_Var2_23 | Quasar 570 | 550 nm |
| RUNX3_Var1_Var2 | NM_001031680.2; NM_004350.2 | aattcagggcgaagactca  | RUNX3_Var1_Var2_24 | Quasar 570 | 550 nm |
| RUNX3_Var1_Var2 | NM_001031680.2; NM_004350.2 | ctgatgtgagaatccatgca | RUNX3_Var1_Var2_25 | Quasar 570 | 550 nm |
| RUNX3_Var1_Var2 | NM_001031680.2; NM_004350.2 | tttctaagccttttaggg   | RUNX3_Var1_Var2_26 | Quasar 570 | 550 nm |
| RUNX3_Var1_Var2 | NM_001031680.2; NM_004350.2 | gttaaaataccgcactgctc | RUNX3_Var1_Var2_27 | Quasar 570 | 550 nm |
| RUNX3_Var1_Var2 | NM_001031680.2; NM_004350.2 | agcatttttagggcagatt  | RUNX3_Var1_Var2_28 | Quasar 570 | 550 nm |
| RUNX3_Var1_Var2 | NM_001031680.2; NM_004350.2 | gcctcacagagacaaccaa  | RUNX3_Var1_Var2_29 | Quasar 570 | 550 nm |
| RUNX3_Var1_Var2 | NM_001031680.2; NM_004350.2 | taggatcaccagaagactg  | RUNX3_Var1_Var2_30 | Quasar 570 | 550 nm |
| RUNX3_Var1_Var2 | NM_001031680.2; NM_004350.2 | aagagaaccgcagcaggag  | RUNX3_Var1_Var2_31 | Quasar 570 | 550 nm |
| RUNX3_Var1_Var2 | NM_001031680.2; NM_004350.2 | caggagctcagcaactatt  | RUNX3_Var1_Var2_32 | Quasar 570 | 550 nm |
| RUNX3_Var1_Var2 | NM_001031680.2; NM_004350.2 | ctaagaagcatgagagggc  | RUNX3_Var1_Var2_33 | Quasar 570 | 550 nm |
| RUNX3_Var1_Var2 | NM_001031680.2; NM_004350.2 | acaatggattcatagctgct | RUNX3_Var1_Var2_34 | Quasar 570 | 550 nm |
| RUNX3_Var1_Var2 | NM_001031680.2; NM_004350.2 | ccagagaacaggagggaaga | RUNX3_Var1_Var2_35 | Quasar 570 | 550 nm |
| RUNX3_Var1_Var2 | NM_001031680.2; NM_004350.2 | gggttagtaatctgggatga | RUNX3_Var1_Var2_36 | Quasar 570 | 550 nm |
| RUNX3_Var1_Var2 | NM_001031680.2; NM_004350.2 | ttacagactcagtcagctg  | RUNX3_Var1_Var2_37 | Quasar 570 | 550 nm |
| RUNX3_Var1_Var2 | NM_001031680.2; NM_004350.2 | aaggacctactttaccagc  | RUNX3_Var1_Var2_38 | Quasar 570 | 550 nm |
| RUNX3_Var1_Var2 | NM_001031680.2; NM_004350.2 | acaacttaacgcagccttg  | RUNX3_Var1_Var2_39 | Quasar 570 | 550 nm |
| RUNX3_Var1_Var2 | NM_001031680.2; NM_004350.2 | ttctacatcagtggtttg   | RUNX3_Var1_Var2_40 | Quasar 570 | 550 nm |
| RUNX3_Var1_Var2 | NM_001031680.2; NM_004350.2 | caaaactcttctctctc    | RUNX3_Var1_Var2_41 | Quasar 570 | 550 nm |
| RUNX3_Var1_Var2 | NM_001031680.2; NM_004350.2 | caggtcacagtaaacactat | RUNX3_Var1_Var2_42 | Quasar 570 | 550 nm |
| RUNX3_Var1_Var2 | NM_001031680.2; NM_004350.2 | aaagattgttaccactact  | RUNX3_Var1_Var2_43 | Quasar 570 | 550 nm |
| RUNX3_Var1_Var2 | NM_001031680.2; NM_004350.2 | cacacctcagcatgacaata | RUNX3_Var1_Var2_44 | Quasar 570 | 550 nm |
| RUNX3_Var1_Var2 | NM_001031680.2; NM_004350.2 | tacatcagatgagtcagca  | RUNX3_Var1_Var2_45 | Quasar 570 | 550 nm |
| RUNX3_Var1_Var2 | NM_001031680.2; NM_004350.2 | atagtcaagcagtttcca   | RUNX3_Var1_Var2_46 | Quasar 570 | 550 nm |
| RUNX3_Var1_Var2 | NM_001031680.2; NM_004350.2 | tgtacaagcaagttgtgcgt | RUNX3_Var1_Var2_47 | Quasar 570 | 550 nm |
| RUNX3_Var1_Var2 | NM_001031680.2; NM_004350.2 | ttcacacatctcagagtta  | RUNX3_Var1_Var2_48 | Quasar 570 | 550 nm |
